# Supplementary material for: Identification of potential inhibitors based on compound proposal contest: Tyrosine-protein kinase Yes as a target
Source: PubMed Central journal article supplement (PMC4660442; doi:10.1038/srep17209), 2015-11-26
Supplement: srep17209-s1.pdf [file srep17209-s1.pdf]

Supplementary Materials for:

Identification of potential inhibitors based on compound proposal contest:  
Tyrosine-protein kinase Yes as a target

Shuntaro Chiba<sup>1</sup>, Kazuyoshi Ikeda<sup>2</sup>, Takashi Ishida<sup>1,3</sup>, M. Michael Gromiha<sup>4</sup>, Y-h. Taguchi<sup>5</sup>, Mitsuo Iwadata<sup>6</sup>, Hideaki Umeyama<sup>6</sup>, Kun-Yi Hsin<sup>7</sup>, Hiroaki Kitano<sup>7,8,9</sup>, Kazuki Yamamoto<sup>10</sup>, Nobuyoshi Sugaya<sup>11</sup>, Koya Kato<sup>12</sup>, Tatsuya Okuno<sup>13</sup>, George Chikenji<sup>12</sup>, Masahiro Mochizuki<sup>14</sup>, Nobuaki Yasuo<sup>3</sup>, Ryunosuke Yoshino<sup>15,16</sup>, Keisuke Yanagisawa<sup>3</sup>, Tomohiro Ban<sup>3</sup>, Reiji Teramoto<sup>17</sup>, Chandrasekaran Ramakrishnan<sup>4</sup>, A. Mary Thangakani<sup>18</sup>, D. Velmurugan<sup>18</sup>, Philip Prathipati<sup>19</sup>, Junichi Ito<sup>19</sup>, Yuko Tsuchiya<sup>19</sup>, Kenji Mizuguchi<sup>19</sup>, Teruki Honma<sup>20</sup>, Takatsugu Hirokawa<sup>21,22</sup>, Yutaka Akiyama<sup>1,3,21,22</sup>, Masakazu Sekijima<sup>1,3,15,22\*</sup>

<sup>1</sup>Education Academy of Computational Life Sciences (ACLS), Tokyo Institute of Technology, 4259 Nagatsutacho, Midori-ku, Yokohama 226-8501 Japan

<sup>2</sup>Level Five Co. Ltd., Shiodome Shibarikyu Bldg., 1-2-3 Kaigan, Minato-ku, Tokyo 105-0022, Japan

<sup>3</sup>Department of Computer Science, Tokyo Institute of Technology, 2-12-1, Ookayama, Meguro-ku, Tokyo 152-8550 Japan

<sup>4</sup>Department of Biotechnology, Bhupat and Jyoti Mehta School of Biosciences, Indian Institute of Technology Madras, Chennai 600 036, Tamilnadu, India<sup>5</sup>Department of Physics, Chuo University, 1-13-27 Kasuga, Bunkyo-ku, Tokyo 112-8551, Japan

<sup>6</sup>Department of Biological Sciences, Chuo University, 1-13-27 Kasuga, Bunkyo-ku, Tokyo 112-8551, Japan

<sup>7</sup>Okinawa Institute of Science and Technology Graduate University, 1919-1 Tancha, Onna-son, Kunigami, Okinawa 904-0495 Japan

<sup>8</sup>The Systems Biology Research Institute, Falcon Building 5F, 5-6-9 Shirokanedai, Minato-ku, Tokyo 108-0071 Japan

<sup>9</sup>Center for Integrative Medical Sciences, RIKEN, 1-7-22 Suehiro-cho, Tsurumi-ku, Yokohama City, Kanagawa, 230-0045, Japan

<sup>10</sup>Research Center for Advanced Science and Technology, The University of Tokyo, 4-6-1 Komaba, Meguro-ku, Tokyo 153-8904 Japan

<sup>11</sup>PharmaDesign Inc., 2-19-8, Hatchobori, Chuo-ku, Tokyo 104-0032 Japan

<sup>12</sup>Department of Computational Science and Engineering, Nagoya University, Furocho, Chikusa, Nagoya 464-8603, Japan

<sup>13</sup>Division of Neurogenetics, Nagoya University Graduate School of Medicine, 65

Tsurumai, Showa-ku, Nagoya 466-8550, Japan

<sup>14</sup>Information and Mathematical Science and Bioinformatics Co., Ltd., Level 6 OWL TOWER, 4-21-1 Higashi-Ikebukuro, Toshima-ku, Tokyo 170-0013 Japan

<sup>15</sup>Global Scientific Information and Computing Center, Tokyo Institute of Technology 2-12-1, Ookayama, Meguro-ku, Tokyo 152-8550 Japan

<sup>16</sup>Department of Biotechnology, The University of Tokyo, 1-1-1 Yayoi, Nunkyo-ku, Tokyo, 113-8657

<sup>17</sup>Forerunner Pharma Research, Co., Ltd., Yokohama Bio Industry Center, 1-6 Shuehiro-cho, Tsurumi-ku, Yokohama 230-0045 Japan

<sup>18</sup>Centre of Advanced Study in Crystallography and Biophysics and Bioinformatics Infrastructure Facility (DBT Funded), University of Madras, Chennai 600025, Tamilnadu, India

<sup>19</sup>National Institute of Biomedical Innovation, Health and Nutrition, 7-6-8 Saito-Asagi, Ibaraki, Osaka 567-008 Japan

<sup>20</sup>Center for Life Science Technologies, RIKEN, 6-7-3 Minatojima-minamimachi, Chuo-ku, Kobe-shi, Hyogo 650-0047 Japan

<sup>21</sup>Molecular Profiling Research Center for Drug Discovery, National Institute of Advanced Industrial Science and Technology, 2-4-7 Aomi, Koto-ku, Tokyo, 135-0064, Japan

<sup>22</sup>Initiative for Parallel Bioinformatics, Level 14 Hibiya Central Building, 1-2-9 Nishi-Shimbashi Minato-Ku, Tokyo 105-0003 Japan

\*Corresponding author

**Table S1.** Inhibition rates of negative compounds in the primary assay.

| ID              | SMILES                                                                        | Inhibition rate of primary assay at 10 uM | Standard deviation of four assay % |
|-----------------|-------------------------------------------------------------------------------|-------------------------------------------|------------------------------------|
| Z96112<br>9172  | <chem>C#CCNC(=O)C1CCN(CC1)c2ncnc(c23)n(C)nc3</chem>                           | 6.9                                       | 9.1                                |
| Z82066<br>8426  | <chem>C1CCCC1NC(=O)CC2CCN(CC2)c3ncnc(c34)n(C)nc4</chem>                       | 23.2                                      | 5.5                                |
| Z11271<br>22422 | <chem>c1nn(C)c(c12)ncnc2N3CCCN(CC3)c4ncccn4</chem>                            | 11.2                                      | 15.3                               |
| Z57385<br>379   | <chem>c1cc(C)ccc1Cn(nc2)c(c23)ncnc3N(CC4)CCC4C</chem>                         | 9.8                                       | 7.9                                |
| Z64640<br>0624  | <chem>c1nn(C)c(c12)ncnc2Nc(cc3F)cc(F)c3N4CCCC4</chem>                         | -7.7                                      | 13                                 |
| Z23448<br>4874  | <chem>c1cccc(Cl)c1Cn(nc2)c(c23)ncnc3N(CC4)CCC4C</chem>                        | 11.3                                      | 8.3                                |
| Z58286<br>917   | <chem>c1cccc1Cn(nc2)c(c23)ncnc3N4CCCC4</chem>                                 | 11.1                                      | 5.9                                |
| Z13572<br>54472 | <chem>COC(=O)Cn(nc1)c(c12)ncnc2N(C3)CCC34CCCCC4</chem>                        | -4.8                                      | 11.2                               |
| Z99486<br>8030  | <chem>O1CCOC12CCN(CC2)c(nc(c34)n(C(C)(C)C)nc3)nc4N(CC5)C<br/>CC56OCCO6</chem> | 13.6                                      | 9.2                                |
| Z11722<br>35384 | <chem>c1cc(Cl)ccc1Cn(nc2)c(c23)ncnc3-n4ccnc4</chem>                           | -2                                        | 13.5                               |
| Z11722<br>35373 | <chem>c1cccc1Cn(nc2)c(c23)ncnc3-n4ccnc4</chem>                                | -5.6                                      | 5.2                                |
| Z22891<br>4588  | <chem>CCCCNC(=O)CN1CCN(CC1)c2ncnc(c23)n(C)nc3</chem>                          | 10.9                                      | 5.2                                |
| Z22900<br>1636  | <chem>COc(cc1)c(OC)cc1CCCN(C)c2ncnc(c23)n(C)nc3</chem>                        | 19.4                                      | 4.1                                |

|                 |                                                             |       |      |
|-----------------|-------------------------------------------------------------|-------|------|
| Z14498<br>82931 | <chem>CC(C)(C)n(nc1)c(c12)nc(C)nc2N(CCO)CCOCC(F)(F)F</chem> | -0.6  | 14.3 |
| Z12624<br>02580 | <chem>CN(C)CC(C)(C)C(C)Nc1ncnc(c12)n(nc2)CC(=O)OC</chem>    | 3     | 4.1  |
| Z35432<br>0796  | <chem>FC(F)n1ccnc1CN(C)c2ncnc(c23)n(C)nc3</chem>            | 26.2  | 7.2  |
| Z75156<br>0976  | <chem>CC(C)(C)OC(=O)NC1CCCN(C1)c2ncnc(c23)n(C)nc3</chem>    | 15.2  | 5.2  |
| Z14498<br>94301 | <chem>CC(C)(C)n(nc1)c(c12)nc(C)nc2NCc3ccnc(c34)cccc4</chem> | -9.3  | 6.4  |
| Z14199<br>66801 | <chem>COC(=O)Cn(nc1)c(c12)ncnc2N3CCCCC3CCC(C)C</chem>       | -4.5  | 12.3 |
| Z83812<br>3396  | <chem>c1cccc1CN(CC2)CCC2CNc3ncnc(c34)n(C)nc4</chem>         | 7     | 3    |
| Z15289<br>87212 | <chem>CC(C)(C)n(nc1)c(c12)ncnc2N(C)Cc3ccc(F)cc3</chem>      | -10.4 | 9.6  |
| Z57075<br>568   | <chem>c1cc(Cl)ccc1Cn(nc2)c(c23)ncnc3N4CCCC4</chem>          | 20.1  | 11.3 |
| Z11241<br>61607 | <chem>CCN(CC)C(=O)C1CCCN1c2ncnc(c23)n(C)nc3</chem>          | 10.7  | 13.6 |
| Z25737<br>2954  | <chem>C1CCCC1C(=O)N2CCN(CC2)c3ncnc(c34)n(C)nc4</chem>       | 3.5   | 12.2 |
| Z64593<br>2702  | <chem>C1CCCN1C(=O)C(=O)N2CCN(CC2)c3ncnc(c34)n(C)nc4</chem>  | 10.9  | 9    |
| Z11704<br>27283 | <chem>COCC(=O)N1CCCCC1C2CCN(CC2)c3ncnc(c34)n(C)nc4</chem>   | 4.3   | 10.7 |
| Z22383<br>5066  | <chem>C1CC=CC1CC(=O)N2CCN(CC2)c3ncnc(c34)n(C)nc4</chem>     | -17.7 | 21.9 |
| Z22382<br>0614  | <chem>CCCNC(=O)CN1CCN(CC1)c2ncnc(c23)n(C)nc3</chem>         | 16.3  | 9    |
| Z35431<br>1120  | <chem>CC(C)NC(=O)CN1CCCN(CC1)c2ncnc(c23)n(C)nc3</chem>      | 1.9   | 6.5  |
| Z22900<br>0416  | <chem>c1cccc(F)c1OCCN(C)c2ncnc(c23)n(C)nc3</chem>           | -7.5  | 17.7 |
| Z57463<br>350   | <chem>c1cc(Cl)ccc1Cn(nc2)c(c23)ncnc3N(CC4)CCC4C</chem>      | 10.8  | 9.2  |

|                 |                                                                            |      |      |
|-----------------|----------------------------------------------------------------------------|------|------|
| Z22900<br>8208  | <chem>c1ccccc1OCCCNc2ncnc(c23)n(C)nc3</chem>                               | 25.7 | 6.1  |
| Z32869<br>3906  | <chem>CNC(=O)c1ccc(cc1)CN(C2CC2)c3ncnc(c34)n(C)nc4</chem>                  | 24.7 | 16.4 |
| Z22862<br>9416  | <chem>c1cccc(Cl)c1Cn(nc2)c(c23)ncnc3N(C4)CC(C)CC4C</chem>                  | 6.4  | 5.2  |
| Z14086<br>93759 | <chem>COC(=O)Cn(nc1)c(c12)ncnc2N(C)C(C3CC)CCCC3</chem>                     | 13.5 | 14.7 |
| Z13484<br>40370 | <chem>COC(=O)Cn(nc1)c(c12)ncnc2NC(C(C)C)CO</chem>                          | 5.1  | 6.4  |
| Z64659<br>9014  | <chem>c1cccc(OC)c1OCCN(C)c2ncnc(c23)n(C)nc3</chem>                         | 23.7 | 12.9 |
| Z24167<br>0488  | <chem>CCNC(=O)CN1CCN(CC1)c2ncnc(c23)n(C)nc3</chem>                         | 6.6  | 13.8 |
| Z11722<br>35399 | <chem>c1cc(C)ccc1Cn(nc2)c(c23)ncnc3-n4ccnc4</chem>                         | 1.9  | 11.9 |
| Z15290<br>33298 | <chem>CC(C)(C)n(nc1)c(c12)ncnc2N(CC3C)CCN3CCOCC</chem>                     | 26.4 | 3.1  |
| Z72908<br>1474  | <chem>CCC(=O)N1CCCN(CC1)c2ncnc(c23)n(C)nc3</chem>                          | 18.7 | 8.7  |
| Z57170<br>044   | <chem>c1cc(Cl)ccc1Cn(nc2)c(c23)ncnc3N4CCCC4</chem>                         | 13.7 | 8.7  |
| Z90963<br>6296  | <chem>c1cccc(c12)n(CC)c(n2)CN(C)c3ncnc(c34)n(C)nc4</chem>                  | 21.2 | 8.1  |
| Z11375<br>93738 | <chem>OCCSCCNc1ncnc(c12)n(C)nc2</chem>                                     | 3.6  | 11.3 |
| Z13798<br>75764 | <chem>COC(=O)Cn(nc1)c(c12)ncnc2N(C(C)C)CCCC</chem>                         | 4.8  | 4.3  |
| Z22382<br>1658  | <chem>CCN(CC)C(=O)CN1CCN(CC1)c2ncnc(c23)n(C)nc3</chem>                     | 5.3  | 8.5  |
| Z80825<br>0054  | <chem>c1cc(F)ccc1CCN(C)c2ncnc(c23)n(C)nc3</chem>                           | 11.5 | 11.3 |
| Z99486<br>6276  | <chem>C1CCCN1C(=O)CN(C)c2nc(nc(c23)n(C(C)(C)C)nc3)N(C)CC(=O)N4CCCC4</chem> | 24.8 | 7.2  |
| Z22873<br>4336  | <chem>c1ccccc1OCCN(C)c2ncnc(c23)n(C)nc3</chem>                             | 14.4 | 7.5  |

|                 |                                                                                 |       |      |
|-----------------|---------------------------------------------------------------------------------|-------|------|
| Z16408<br>90828 | <chem>CC(C)(C)n(nc1)c(c12)ncnc2NC(C)Cc3cc(O)c(O)cc3</chem>                      | -18.9 | 12.6 |
| Z15014<br>80425 | <chem>OCCNCCNc1ccc(NCCNCCO)c(c12)C(=O)c3c(C2=O)c(O)ccc3</chem><br>O             | -5.9  | 7.5  |
| Z15466<br>24232 | <chem>C1CN(C)CCN1Cc(cc2)ccc2C(=O)Nc(cc3)cc(c3C)Nc(n4)nccc4-c</chem><br>5ccnc5   | 4.6   | 10.4 |
| Z56227<br>192   | <chem>c1cccc(O)c1C(=O)c(c2)cnc(c23)n(CCO)nc3-c4cccc4</chem>                     | 26.1  | 7.5  |
| Z24437<br>3888  | <chem>COc(cc1)c(OC)cc1C(N2CCOCC2)CNc3nc(-c4ccnc4)nc(c35)cc</chem><br>cc5        | 4.1   | 15.2 |
| Z55864<br>190   | <chem>c1c(Cl)ccc(O)c1C(=O)c(c2)cnc(c23)n(CCO)nc3C</chem>                        | 12.7  | 3    |
| Z55864<br>153   | <chem>c1c(F)ccc(O)c1C(=O)c(c2)cnc(c23)n(CCO)nc3C</chem>                         | -5    | 7.6  |
| Z55864<br>338   | <chem>c1c(Cl)cc(Cl)c(O)c1C(=O)c(c2)cnc(c23)n(CCO)nc3C</chem>                    | 24    | 4.9  |
| Z56811<br>117   | <chem>Cc(c1)ccc(c1C)NC(=O)c2cc(ccc2)Nc(nc(c34)ccc(Cl)c4)nc3-c5ccc</chem><br>cc5 | 15.8  | 2.8  |
| Z22061<br>7850  | <chem>c1ccc(Cl)cc1NC(=O)c2ccc(cc2)Nc(nc(c34)cccc4)nc3-c5cccc5</chem>            | -4.8  | 8.5  |
| Z57380<br>492   | <chem>c1cccc1NC(=O)c2cc(ccc2)Nc(nc(c34)ccc(Br)c4)nc3-c5cccc5</chem>             | 21.8  | 8.5  |
| Z22061<br>7840  | <chem>c1cc(O)ccc1NC(=O)c2ccc(cc2)Nc(nc(c34)ccc(C)c4)nc3-c5cccc5</chem>          | 2.5   | 8.3  |
| Z14127<br>55282 | <chem>c1ccc(C)c(c1C)NC(=O)c2ccc(cc2)Nc(nc(c34)cc(Cl)cc4)nc3-c5ccc</chem><br>cc5 | 4.9   | 10.2 |
| Z57110<br>409   | <chem>c1cccc1NC(=O)c2ccc(cc2)Nc(nc(c34)ccc(C)c4)nc3-c5cccc5</chem>              | 9.9   | 7.7  |
| Z56811<br>126   | <chem>c1cccc1NC(=O)c2ccc(cc2)Nc(nc(c34)ccc(Br)c4)nc3-c5cccc5</chem>             | 10.4  | 3.5  |
| Z15518<br>44014 | <chem>c1ccc(OC)cc1NC(=O)c2ccc(cc2)Nc(nc(c34)ccc(C)c4)nc3-c5cccc</chem><br>5     | 9.7   | 7.8  |
| Z22061<br>7848  | <chem>Cc1ccc(cc1)NC(=O)c2ccc(cc2)Nc(nc(c34)ccc(C)c4)nc3-c5cccc5</chem>          | -5.4  | 5.6  |
| Z56808<br>888   | <chem>c1cc(Cl)ccc1NC(=O)c2ccc(cc2)Nc(nc(c34)ccc(Cl)c4)nc3-c5cccc</chem><br>5    | -12.1 | 6    |

|                 |                                                                                    |      |      |
|-----------------|------------------------------------------------------------------------------------|------|------|
| Z15400<br>85909 | <chem>c1cccc(Cl)c1N(CC2)CCN2C(=O)c3cc(ccc3)Nc(nc(c45)ccc(Cl)c5)nc4-c6ccccc6</chem> | 9.6  | 5.6  |
| Z14093<br>31242 | <chem>c1cccc(Cl)c1N(CC2)CCN2C(=O)c3ccc(cc3)Nc(nc(c45)ccc(Br)c5)nc4-c6ccccc6</chem> | 6    | 21.5 |
| Z14137<br>67126 | <chem>c1cccc(Cl)c1N(CC2)CCN2C(=O)c3ccc(cc3)Nc(nc(c45)cc(Cl)cc5)nc4-c6ccccc6</chem> | -2.9 | 11.7 |
| Z57380<br>489   | <chem>c1ccccc1N(CC2)CCN2C(=O)c3ccc(cc3)Nc(nc(c45)ccc(Cl)c5)nc4-c6ccccc6</chem>     | 11.8 | 6    |
| Z56832<br>109   | <chem>CCCOc(cc1)ccc1-c(nc(c23)cccc3)nc2Nc(c4)ccc(Cl)c4Cl</chem>                    | 2.6  | 3.2  |
| Z90250<br>646   | <chem>c1cccc(C2=O)c1C(=O)c(c23)cccc3NC(=O)CN4CCN(CC4)Cc5cc(cc(c56)cccc6</chem>     | -6.2 | 6.1  |
| Z57110<br>492   | <chem>C1CN(C)CCN1C(=O)c2ccc(cc2)Nc(nc(c34)ccc(Cl)c4)nc3-c5ccc(cc5</chem>           | 17.6 | 8.1  |
| Z56844<br>693   | <chem>COc(cc1)ccc1Nc2nnc(c23)cccc3</chem>                                          | 12   | 9.2  |
| Z27073<br>5308  | <chem>COc(cc1)ccc1Nc2nnc(c23)ccc(Cl)c3</chem>                                      | 9.4  | 13.5 |
| Z28180<br>2592  | <chem>COc1c(OC)ccc(c1)Nc2nnc(c23)cccc3</chem>                                      | 3.6  | 9.7  |
| Z57081<br>336   | <chem>CCOc(cc1)ccc1Nc2nc(C)nc(c23)cccc3</chem>                                     | 10.4 | 7.9  |
| Z39785<br>8992  | <chem>COCCOc(cc1)ccc1Nc2nnc(c23)cccc3</chem>                                       | 1.5  | 3.9  |
| Z22875<br>9408  | <chem>c1cc(Cl)cc(c12)nnc2Nc(c3)ccc(c34)OCCCO4</chem>                               | 23   | 7.4  |
| Z11833<br>2870  | <chem>c1cccc(F)c1OCCNc2nnc(c23)cc(OC)c(c3)OC</chem>                                | 25.3 | 10.1 |
| Z11852<br>7078  | <chem>c1cccc(c12)OCC(O2)CNe3nnc(c34)cc(Cl)cc4</chem>                               | 26.9 | 7.4  |
| Z46381<br>324   | <chem>c1ccc(OC)c(OC)c1CN(C)CC(=O)Nc2cccc(c23)C(=O)c4c(C3=O)cccc4</chem>            | 2.3  | 7.7  |
| Z46444<br>703   | <chem>c1cccc(Cl)c1C(C)NCC(=O)Nc2cccc(c23)C(=O)c4c(C3=O)cccc4</chem>                | 3.7  | 10.7 |
| Z46313<br>150   | <chem>c1ccc(OC)cc1CN(C)CC(=O)Nc2cccc(c23)C(=O)c4c(C3=O)cccc4</chem>                | -0.5 | 17.1 |

|                 |                                                                            |      |      |
|-----------------|----------------------------------------------------------------------------|------|------|
| Z46372<br>242   | <chem>COc(cc1)c(OC)cc1CN(C)CC(=O)Nc2cccc(c23)C(=O)c4c(C3=O)cccc4</chem>    | -1.1 | 6.7  |
| Z57976<br>235   | <chem>c1c(Cl)ccc(O)c1C(=O)c(en2)cn(c23)nc(n3)CCCO</chem>                   | 7.5  | 13.4 |
| Z57975<br>467   | <chem>c1c(F)ccc(O)c1C(=O)c(en2)cn(c23)nc(n3)CCCO</chem>                    | 22.7 | 7.1  |
| Z46320<br>490   | <chem>CCOe(cc1)c(OC)cc1CN(C)CC(=O)Nc2cccc(c23)C(=O)c4c(C3=O)cccc4</chem>   | 17.1 | 14.8 |
| Z16342<br>0324  | <chem>CCOe(cc1)c(OC)cc1CN(CC)CC(=O)Nc2cccc(c23)C(=O)c4c(C3=O)cccc4</chem>  | 16.3 | 16.7 |
| Z46421<br>033   | <chem>Cc1c(C)cccc1NC(=O)CN(C)CC(=O)Nc2cccc(c23)C(=O)c4c(C3=O)cccc4</chem>  | 26.7 | 3.8  |
| Z46504<br>318   | <chem>c1cccc(c1C)N(CC2)CCN2CC(=O)Nc3cccc(c34)C(=O)c5c(C4=O)cccc5</chem>    | 3.6  | 12.3 |
| Z46200<br>293   | <chem>c1cccc(Cl)c1N(CC2)CCN2CC(=O)Nc3cccc(c34)C(=O)c5c(C4=O)cccc5</chem>   | 2.5  | 8.6  |
| Z46223<br>556   | <chem>Cc1c(C)cccc1N(CC2)CCN2CC(=O)Nc3cccc(c34)C(=O)c5c(C4=O)cccc5</chem>   | 17.3 | 6.5  |
| Z44516<br>332   | <chem>c1cccc(O)c1N(CC2)CCN2C(C)C(=O)Nc3cccc(c34)C(=O)c5c(C4=O)cccc5</chem> | 5.2  | 6    |
| Z46203<br>278   | <chem>c1ccc(Cl)cc1N(CC2)CCN2CC(=O)Nc3cccc(c34)C(=O)c5c(C4=O)cccc5</chem>   | 13.2 | 5.3  |
| Z46174<br>104   | <chem>c1ccccc1N(CC2)CCN2CC(=O)Nc3cccc(c34)C(=O)c5c(C4=O)cccc5</chem>       | 15.4 | 4.6  |
| Z46211<br>489   | <chem>n1ccnc1N(CC2)CCN2CC(=O)Nc3cccc(c34)C(=O)c5c(C4=O)cccc5</chem>        | 15.9 | 6.7  |
| Z56759<br>010   | <chem>ClCC(=O)Nc1cccc(c12)C(=O)c3c(C2=O)cccc3</chem>                       | 17   | 6.1  |
| Z12300<br>97675 | <chem>CC(C)(O)COc(cc1)ccc1Nc2cc(Cl)nc(n2)N</chem>                          | 17.7 | 6.9  |
| Z13315<br>48892 | <chem>c1cc(C)nc(c12)ncc(c2O)C(=O)NCC(CO)Cc3c(F)ccc(F)c3</chem>             | 13.9 | 4    |
| Z31253<br>513   | <chem>COc1c(Cl)cc(cc1)Nc2nc(-c3ccnc3)nc(c24)cccc4</chem>                   | 0.8  | 5.9  |
| Z23961<br>7942  | <chem>COc(c1)c(OC)cc(c1C)Nc2nc(-c3ccncc3)nc(c24)cccc4</chem>               | 1.9  | 7.4  |



|                |                                                                                                   |      |      |
|----------------|---------------------------------------------------------------------------------------------------|------|------|
| Z31184<br>275  | c1cccc(c12)nc(-c3ccnc3)nc2Nc(c4)ccc(c45)OCCCO5                                                    | 0.8  | 6.8  |
| Z31070<br>725  | c1ccc(OC)cc1C(N2CCCC2)CNc3nc(-c4ccnc4)nc(c35)cccc5                                                | 22.8 | 6.8  |
| Z25060<br>862  | c1cccc(c12)nc(c(c2C)C(=O)OCC)COC(=O)C34CC5(O)CC(C3)CC(C4)C5                                       | -0.5 | 19.8 |
| Z19211<br>876  | C1C(C2)CC(C3)CC2CC13NC(=O)COC(=O)c4c(CC)c(CCC)nc(c45)cccc5                                        | 2.3  | 3.3  |
| Z26510<br>790  | C1C(C2)CC(C3)CC2CC13C(C)NC(=O)c(c4)ccc(c45)C(=O)N(C5=O)C6ccncc6                                   | -1.8 | 5.5  |
| Z48754<br>256  | C1CCCC1NC(=O)Cn(\c(s2)=C\C(=O)C(C)(C)C)c(=O)\c2=C\c3cccc(c34)cccc4                                | -7.9 | 5.1  |
| Z18260<br>190  | COc(c1)ccc(OC)c1\C=C\C(=O)OCC(=O)Nc(cccc2)c2C(=O)NC3CCCC3                                         | 14.4 | 5.9  |
| Z25878<br>227  | N#Cc1c(=O)n(C2CC2)cc(c1)C(=O)c3c(ccc(C)c3)OCC(=O)Nc(c4)ccc(c45)CCC5                               | 6.9  | 5.3  |
| Z89960<br>427  | Cc1csc(=O)n1CCC(=O)OCc2csc(n2)Nc3ccc(cc3)OC                                                       | 19.7 | 4.7  |
| Z21774<br>7250 | C1COc(c12)ccc(c2)C(=O)CN(C3=O)C(=O)c(c34)cccc4                                                    | 3.5  | 9.7  |
| Z94211<br>6646 | c1cccc(c12)[nH]c(c2)CNC(=O)c3c(=O)cc(C)n(n3)-c(cc4C(F)(F)F)ccc4                                   | 0.2  | 16.2 |
| Z56951<br>930  | Cc1ccc(cc1)-c2nn(c(c23)nc(C)cc3O)-c4cccc4                                                         | 24.2 | 6.4  |
| Z22105<br>0600 | c1cccc1-c(cco2)c2C(=O)NCCn(c(n3)C)c(c34)cccc4                                                     | 0.4  | 12.3 |
| Z90787<br>213  | c1cccc(c12)n(CCC)c(n2)NC(=O)c3c(C)nc(s3)-c4cccs4                                                  | 6.9  | 5.7  |
| Z16705<br>0178 | Cc1c([N+])([O-])=O)cc(cc1)NC(=O)c2c(C)nc(cc2)-c3cccc3                                             | 15.2 | 5.8  |
| Z56915<br>658  | c1cccc(c12)nc(-c3ccncc3)cc2C(=O)N(c4oc(-c5ccco5)c(c4C#N)-c6ccco6)C(=O)c7cc(-c8ccncc8)nc(c79)cccc9 | 13.1 | 10   |
| Z10434<br>2398 | C1CCCC1NC(=O)c2cc(ccc2)NC3=C(Cl)C(=O)N(C3=O)Cc4ccc4                                               | 11.2 | 5.7  |
| Z11158<br>1602 | c1cccc(c12)oc(c2)C(=O)Nc(c3)ccc(Cl)c3C(=O)OC                                                      | -8.3 | 7.1  |

|                 |                                                                           |       |      |
|-----------------|---------------------------------------------------------------------------|-------|------|
| Z14432<br>3220  | CC1C(C)Oc(c12)c(ccc2)C(=O)Nc(ccc3)cc3C(=O)Nc(c4C)c(=O)n<br>(n4C)-c5ccccc5 | 13.9  | 9.9  |
| Z38525<br>9374  | Cc(n1)sc1CSc(cc2)ccc2C(=O)Nc(cc3)ccc3CN(CC4)CCN4CC                        | -18.4 | 10.4 |
| Z44306<br>217   | c1cccc(c12)NC(=O)C\2=C\c3csc(n3)-c4ccc(Cl)cc4                             | -14.4 | 21.7 |
| Z99494<br>490   | c1cccc(c12)nc(-c3cccs3)cc2C(=O)N(CC4)CCC4C(=O)Nc(c5)ccc<br>(c56)OCO6      | -5.2  | 4.9  |
| Z82133<br>6010  | CNC(=O)c1ccc(=O)n(c1)Cc2cc(=O)oc(c23)cc(CC)cc3                            | 20    | 11.5 |
| Z13235<br>62595 | CN(C)C(=O)C1CCCN1C(=O)Nc2ccc(cc2)OCCN3CCN(C)CC3                           | 10.9  | 19.5 |
| Z28668<br>391   | N#Cc1ccc(cc1)C(=O)Nc(cc2)ccc2-c(n3)cn(c34)ccs4                            | 14.9  | 4.3  |
| Z16825<br>131   | c1ccccc1C2=NN(CC2)C(=O)CSc(n3C4CC4)nnc3COc5c(Cl)ccc<br>c5                 | 16.7  | 9.8  |
| Z91710<br>837   | Cc1nc(no1)-c2ccc(cc2)OCC(=O)Nc(ccc3)cc3C(=O)Nc(cc4C(F)(<br>F)F)ccc4       | 15.1  | 8.1  |
| Z11392<br>11749 | N#Cc1c(C)c(C)nnc1NCC(CC2)Cn(c23)c(mn3)C(C)C                               | 25.8  | 10.1 |
| Z25491<br>415   | O1COc(c12)ccc(c2)CNC(=O)CSc(n3)n(-c4ccccc4)cc3-c5cc([N+]<br>([O-])=O)ccc5 | 0.8   | 9.5  |
| Z52934<br>197   | C1CC1NC(=O)CNe2cc(ccc2)S(=O)(=O)N(C)c3ccccc3                              | 5.4   | 7.7  |
| Z40372<br>8182  | O1COc(c12)cc(cc2Cl)C(=O)NC(C)c(mn3)n(c34)CCC4                             | 3.9   | 7.6  |
| Z36419<br>8102  | c1cccc(c12)oc(c2COC)C(=O)Nc3cc(ccc3)N(C4=O)CCO4                           | 11.8  | 9.9  |
| Z59591<br>3416  | C1CCCCC1NC(=O)c2cc(C)c(cc2)NC(=O)NCCCCN3CCOCC3                            | 1.8   | 6.3  |
| Z91187<br>460   | n1cn1-c(cc2)ccc2C(=O)NCCc(mn3)n(c34)cccc4                                 | 23.7  | 3    |
| Z38165<br>6616  | Cn(c1)c(=O)[nH]c(=O)c1C(=O)N2CCN(CC2)Cc3csc(n3)-c4ccc(<br>cc4)OC          | -4.9  | 3.3  |
| Z56949<br>551   | CCOC(=O)c1c(NC(=O)CCl)cc(s1)-c2ccc(F)cc2                                  | -2.4  | 3.1  |

|                 |                                                                                     |       |      |
|-----------------|-------------------------------------------------------------------------------------|-------|------|
| Z78597<br>2562  | <chem>c1ccc(F)cc1CC(=O)Nc(nc2)nc2-c3ccccc3</chem>                                   | 2.2   | 6.4  |
| Z48851<br>471   | <chem>c1cccc(Cl)c1Cn(c(C)c2)c(C)c2-c3csc(n3)Nc(c4)ccc(c45)OCCO5</chem>              | -8.2  | 10.6 |
| Z22056<br>4906  | <chem>CCc(c1)sc(c12)nc(C)nc2Nc3cc(O)ccc3</chem>                                     | 1.1   | 9.3  |
| Z25329<br>3494  | <chem>s1cccc1CN(CC)C(=O)c2cc(n[nH]2)-c(cc3)ccc3C</chem>                             | -3.5  | 2.4  |
| Z10411<br>13978 | <chem>c1cc(Cl)cc(c1C)-n(nc2)c(c23)ncnc3Nc4ccc(cc4)Oc5ccc(Cl)cc5</chem>              | 11.4  | 4.1  |
| Z28655<br>806   | <chem>s1cccc1\C=C\C(=O)Nc2nnc(s2)SCc3c(Cl)cccc3Cl</chem>                            | 2.8   | 3.4  |
| Z89291<br>848   | <chem>Cc(c1)ccn(c12)cc(n2)C(=O)Nc(c3)ccc(c34)OCO4</chem>                            | 18.7  | 2.7  |
| Z19514<br>186   | <chem>CCOc(cc1)ccc1-n2c(SCC(=O)c3cccs3)nnc2-c4c[nH]c(c45)cccc5</chem>               | -2.8  | 4.5  |
| Z15656<br>934   | <chem>CCCC(C)NC(=O)COC(=O)CC(c1ccccc1)NC(=O)c2c(Cl)cccc2</chem>                     | 12    | 12.3 |
| Z38165<br>4216  | <chem>Cc(c1)ccc(c12)[nH]c(c2Cl)C(=O)Nc(c3)ccc(c34)[nH]c(=O)[nH]4</chem>             | -5.3  | 4.1  |
| Z22537<br>4568  | <chem>c1ccccc1-c(n2)c(n(c23)cc(C)cc3)NC(=O)CCc4ncc(o4)-c5ccc(Cl)c<br/>c5</chem>     | -7.3  | 15.2 |
| Z24132<br>420   | <chem>FC(F)Oc(cc1)ccc1\C=C\C(=O)OCC(=O)NCc2c(Cl)cccc2</chem>                        | 6.9   | 7.7  |
| Z16764<br>8830  | <chem>c1c(F)cc(F)cc1NC(=O)c2cc([N+](=[O-])=O)c(cc2)NC3CC3</chem>                    | 6.8   | 12.8 |
| Z22699<br>8132  | <chem>C1COCCN1Cc2ccc(cc2)NC(=O)CSc3ncnc(c34)n(nc4)-c5ccc(F)<br/>cc5</chem>          | 8.9   | 7.6  |
| Z26706<br>965   | <chem>c1ccccc1CC(C(=O)NC(C)CCC)NC(=O)OCc2ccccc2</chem>                              | -11.7 | 12.5 |
| Z71577<br>556   | <chem>c1ccccc1C(=O)c2ccc(cc2)C(=O)Nc(c3O)nccc3</chem>                               | -3.9  | 14.8 |
| Z25043<br>114   | <chem>c1ccccc1-n(n2)c(C)c(c2C)NC(=O)COC(=O)c3nc(-c4ccccc4)n(n3<br/>)c5ccccc5</chem> | 12.6  | 6    |
| Z88541<br>443   | <chem>CCNC(=O)C(C)NC(=O)c(c1)c(cc(c12)cccc2)OCc3c(C)noc3C</chem>                    | 10.1  | 6.9  |

|                 |                                                                              |      |      |
|-----------------|------------------------------------------------------------------------------|------|------|
| Z36598<br>6106  | <chem>C1CCCCC1N(C)C(=O)c2n[nH]c(c23)ccc(c3)[N+](O-)=O</chem>                 | 3.5  | 11.8 |
| Z29325<br>776   | <chem>Cc1cnc(s1)NC(=O)c2cc(ccc2)S(=O)(=O)N(C)c3cc(Cl)ccc3</chem>             | -2.4 | 4.5  |
| Z96618<br>1786  | <chem>FC(F)(F)CCN(CC)C(=O)c1cc(Br)ccc1</chem>                                | 20   | 12.2 |
| Z82156<br>307   | <chem>c1sccc1C(=O)OCc2csc(n2)Nc3ccc(cc3)OC</chem>                            | -5.8 | 8.2  |
| Z31461<br>7634  | <chem>c1cc(F)ccc1-n(c(c23)ncnc3O)cc2-c4cccc4</chem>                          | 5.3  | 9.3  |
| Z44307<br>701   | <chem>O1COc(c12)cc(cc2OC)/C=C\C#N)c(n3)[nH]c(c34)cccc4</chem>                | 11.1 | 3.4  |
| Z37250<br>4624  | <chem>c1[nH]ncc1NC(=O)C2=NN(c3ccccc3)C(C2)c4cccc4</chem>                     | 3.8  | 8.2  |
| Z15951<br>070   | <chem>N#Cc1c(Cl)cc(cc1)NC(=O)COC(=O)CC(c2ccccc2)NC(=O)c3ccc<br/>cc3</chem>   | 2.2  | 7.7  |
| Z10120<br>7250  | <chem>Cc1cc(O)c(cc1)NC(=O)c2cc(ccc2)NC(=O)OCC</chem>                         | 13.1 | 13.6 |
| Z26860<br>269   | <chem>CCC(C)c1c(cccc1)NC(=O)c(c2C)oc(c23)ccc(c3)OC</chem>                    | 19   | 9.8  |
| Z56846<br>281   | <chem>c1ccccc1C[C@@H](NC(=O)c2cccs2)C(=O)OCC(=O)NCc3ccccc3</chem>            | 12.1 | 6.7  |
| Z25532<br>1108  | <chem>Cc1noc(C(C)C)c1C(=O)Nc2ccc(cc2)Nc3ccc(cc3)OC</chem>                    | -5.2 | 6.4  |
| Z28878<br>8168  | <chem>c1ccccc1CC(C(=O)NCC2CC2)NC(=O)OCc3ccccc3</chem>                        | -1.1 | 10.7 |
| Z18159<br>821   | <chem>s1cccc1CNC(=O)COC(=O)/C=C/c2ccc(cc2)OCC=C</chem>                       | -10  | 17.3 |
| Z31933<br>3156  | <chem>[nH]1c(=O)oc(c12)ccc(c2)NC(=O)/C=C/c3ccc(o3)C(C4)C4C</chem>            | -4   | 20.1 |
| Z12637<br>14226 | <chem>CCOC(=O)c1ccc(cc1)NC(=O)c(cc2)cc(c23)ncnc3Nc(cc4)ccc4C(=O)OCC</chem>   | 20.4 | 10.4 |
| Z19446<br>1442  | <chem>Cc1oc(=O)cc(C)c1C(=O)OCc2csc(n2)Nc3ccc(cc3)OC</chem>                   | 12   | 8.3  |
| Z74888<br>8318  | <chem>o1cccc1C(=O)NCCC(=O)Nc(c2)ccc(c23)[nH]c(n3)-c4c(F)ccc(F)<br/>c4</chem> | 3.2  | 3.2  |

|                 |                                                                              |      |      |
|-----------------|------------------------------------------------------------------------------|------|------|
| Z72956<br>4206  | <chem>c1ccccc1\C=C\C(=O)Nc2ccc(cc2)NC(=O)c3c(C)onc3</chem>                   | 5.1  | 8.7  |
| Z50079<br>382   | <chem>CC1=C/C(CC1)=N\NC(=O)c2c(N)cc(s2)-c3ccc(Cl)cc3</chem>                  | -8.1 | 6.6  |
| Z16033<br>354   | <chem>c1ccccc1COC(=O)NC(Cc2c[nH]c(c23)cccc3)C(=O)OCC(=O)Nc4cccc(C)c4C</chem> | 4.4  | 11.5 |
| Z56910<br>691   | <chem>COc(cc1)ccc1CCNC(=O)C(=Cc2ccco2)C(=O)NCCc3ccc(cc3)OC</chem>            | 5.1  | 7.2  |
| Z99396<br>0742  | <chem>c1ccc(F)cc1CCNC(=O)C(Cc2ccccc2)C(=O)NCCc3cc(F)ccc3</chem>              | -5.9 | 7.6  |
| Z57455<br>953   | <chem>OCCNc1ncnc(c12)n(-c3ccc(F)cc3)cc2-c4ccccc4</chem>                      | 2.4  | 7.4  |
| Z36280<br>7152  | <chem>Cc1cc(Cl)cc(c12)ccn2</chem>                                            | 11.7 | 11.3 |
| Z23554<br>2858  | <chem>c1cc(C)nc(c12)cc(Cl)cc2</chem>                                         | 13.5 | 8.5  |
| Z29546<br>1060  | <chem>Fc1ccc(C)c(c12)nc2</chem>                                              | -0.2 | 3.7  |
| Z55928<br>967   | <chem>Cc1cc(Cl)nc(c12)c(C)ccc2</chem>                                        | 2.5  | 3.8  |
| Z57012<br>199   | <chem>Cc1cc(Cl)nc(c12)cccc2</chem>                                           | -5.1 | 4.5  |
| Z56347<br>058   | <chem>Cc1cc(Cl)nc(c12)cc(C)cc2</chem>                                        | 4.6  | 11.8 |
| Z21217<br>0818  | <chem>Clc1c(C)ccc(c12)ccn2</chem>                                            | 4.6  | 6.5  |
| Z11982<br>19341 | <chem>Clc1c(C)enc(c12)cccc2</chem>                                           | 6.7  | 10.5 |
| Z36187<br>8560  | <chem>c1ccnc(c12)ccc(F)c2</chem>                                             | 12.6 | 9.2  |
| Z10448<br>5978  | <chem>c1cccc(c12)nc(Cl)cc2</chem>                                            | 15.9 | 8.8  |
| Z43151<br>1594  | <chem>c1c(Br)ccc(c12)nc2Cl</chem>                                            | 17.4 | 5.2  |
| Z41565<br>3134  | <chem>Cc1c[nH]c(c12)cccc2</chem>                                             | 13.3 | 17.6 |

|                 |                                            |       |      |
|-----------------|--------------------------------------------|-------|------|
| Z11712<br>17428 | <chem>c1ccc(C)c(c12)[nH]cc2</chem>         | 19.7  | 7.8  |
| Z12031<br>62600 | <chem>Cc(c1)[nH]c(c12)ccc(Cl)c2</chem>     | -5.1  | 8.6  |
| Z12108<br>89726 | <chem>c1cc(Br)cc(c12)nccc2Cl</chem>        | 5.8   | 7.6  |
| Z43151<br>1746  | <chem>c1ccc(Br)c(c12)nccc2Cl</chem>        | 10.1  | 11.3 |
| Z56926<br>563   | <chem>c1cc(C)nc(c12)cccc2</chem>           | 20.3  | 6.1  |
| Z38497<br>0524  | <chem>c1cc(C)cc(c12)[nH]cc2</chem>         | 11.8  | 7.4  |
| Z57369<br>984   | <chem>Cc(c1)c(C)cc(c12)n(C)cn2</chem>      | -20.8 | 8.6  |
| Z38272<br>3676  | <chem>c1c[nH]c(c12)cc(F)cc2</chem>         | 17    | 13.8 |
| Z10208<br>23312 | <chem>Clc1c[nH]c(c12)cccc2</chem>          | -2    | 6.1  |
| Z11609<br>02020 | <chem>c1c[nH]c(c12)ccc(F)c2</chem>         | 16.7  | 6.6  |
| Z33092<br>2562  | <chem>BrCc1cc(Cl)cc(c12)ccn2</chem>        | -3.1  | 9.8  |
| Z33092<br>2554  | <chem>BrCc1c(Cl)ccc(c12)ccn2</chem>        | 2.8   | 10.8 |
| Z33091<br>7140  | <chem>c1c[nH]c(c12)ccc(c2)-c3ccccc3</chem> | -7.6  | 4.1  |
| Z24327<br>7338  | <chem>n1cccc(c12)cccc2F</chem>             | -2.7  | 8.7  |
| Z12031<br>62476 | <chem>Cc(c1)[nH]c(c12)ccc(F)c2</chem>      | -3.3  | 4.8  |
| Z56766<br>547   | <chem>c1cccn(c12)c(C)c(c2)-c3ccccc3</chem> | -5.9  | 6.9  |
| Z14765<br>2344  | <chem>c1cc(Cl)cc(c12)ncnc2Cl</chem>        | 10.9  | 6    |
| Z72760<br>0806  | <chem>Clc1ncnc(c12)cccc2F</chem>           | 1.9   | 3.1  |

|                 |                                                 |       |      |
|-----------------|-------------------------------------------------|-------|------|
| Z11999<br>0038  | <chem>c1cccc(c12)ncnc2Cl</chem>                 | 6.7   | 9.6  |
| Z56924<br>486   | <chem>Cc1cc(Cl)nc(c12)c(C)cc(C)c2</chem>        | 1.6   | 0.9  |
| Z38497<br>0526  | <chem>Cc1cccc(c12)[nH]cc2</chem>                | 15    | 5    |
| Z12691<br>73059 | <chem>BrC1ccc(C)c(c12)nc2</chem>                | -19.9 | 7.3  |
| Z53833<br>303   | <chem>n1cn(C)c(c12)cccc2</chem>                 | 14.6  | 11.4 |
| Z57200<br>682   | <chem>Cc(c1)[nH]c(c12)cccc2</chem>              | 11.3  | 3.9  |
| Z11999<br>0034  | <chem>c1c(Cl)ccc(c12)ncnc2Cl</chem>             | 5.4   | 11.7 |
| Z10447<br>2852  | <chem>c1ccnc(c12)cccc2</chem>                   | 5.3   | 13.6 |
| Z12168<br>14187 | <chem>CC(C)(C)n(en1)c(c12)cccc2</chem>          | 13.4  | 8.4  |
| Z56174<br>838   | <chem>c1cccc(c12)[nH]c(c2)-c3cccc3</chem>       | 15.1  | 16.2 |
| Z57983<br>000   | <chem>ClCc(c1)c(Cl)nc(c12)cccc2</chem>          | 3.8   | 10.8 |
| Z31611<br>8462  | <chem>c1c(Br)ccc(c12)ncnc2Cl</chem>             | 7.2   | 3.1  |
| Z12692<br>15995 | <chem>c1cc(C)nc(c12)ccc(Br)c2</chem>            | -2.2  | 6.9  |
| Z56347<br>310   | <chem>ClCc(c1)c(Cl)nc(c12)cc(C)cc2</chem>       | -6.4  | 10   |
| Z33091<br>1506  | <chem>BrCc1cc(F)cc(c12)cccn2</chem>             | 17.8  | 17.1 |
| Z57114<br>897   | <chem>c1ccccc1C(C)n(en2)c(c23)cccc3</chem>      | 20.5  | 5    |
| Z90019<br>8800  | <chem>c1ccccc1COc(c2)ccc(c23)nc3</chem>         | 3.4   | 13.4 |
| Z22302<br>6186  | <chem>CNC(C)c1ccc(cc1)-n(en2)c(c23)cccc3</chem> | 19.3  | 2.9  |

|                |                                                                       |       |      |
|----------------|-----------------------------------------------------------------------|-------|------|
| Z29546<br>3532 | <chem>COc(cc1)ccc1-n(c(c23)ncnc3O)cc2-c4ccccc4</chem>                 | -7.6  | 15.8 |
| Z55627<br>443  | <chem>Cc1cc(C)nc(c12)n(-c3ccccc3)nc2-c(cc4)ccc4C</chem>               | -8    | 6.9  |
| Z57456<br>164  | <chem>OCCNc1ncnc(c12)n(-c3ccc(cc3)OCC)cc2-c4ccccc4</chem>             | -2.3  | 23.6 |
| Z56801<br>548  | <chem>Nc1ncnc(c12)n(nc2)-c3ccccc3</chem>                              | -5.9  | 4.9  |
| Z31460<br>6428 | <chem>NNc1ncnc(c12)n(nc2)-c3ccc(Cl)cc3</chem>                         | 23.1  | 19.9 |
| Z68084<br>2008 | <chem>O=c1cc(C)[nH]c(c12)n(CCO)nc2-c(c3C)cccc3</chem>                 | -3.7  | 7.8  |
| Z28578<br>2396 | <chem>CN(C)c1ncnc(c12)n(nc2)-c3ccc(F)cc3</chem>                       | 5.5   | 3.8  |
| Z57979<br>075  | <chem>CCc1ccc(cc1)-c2nn(c(c23)[nH]c(cc3=O)COC)-c4ccccc4</chem>        | 2.7   | 5.7  |
| Z57979<br>355  | <chem>c1ccccc1-n(c(c23)[nH]c(CC)cc3=O)nc2-c4ccccc4</chem>             | 13.3  | 6    |
| Z57455<br>954  | <chem>OCCCNc1ncnc(c12)n(-c3ccccc3)cc2-c4ccccc4</chem>                 | 5.7   | 7.6  |
| Z57455<br>872  | <chem>OCCCNc1ncnc(c12)n(-c3ccc(cc3)OC)cc2-c4ccccc4</chem>             | -6.7  | 9    |
| Z22041<br>6906 | <chem>CON(C)c1ncnc(c12)n(nc2)-c3ccccc3</chem>                         | -7.2  | 4.3  |
| Z57455<br>467  | <chem>c1ccccc1-c2cn(-c3ccc(F)cc3)c(c24)ncnc4N5CCOCC5</chem>           | -14.4 | 14.3 |
| Z22783<br>2758 | <chem>Nc1ncnc(c12)n(c(C)c2C)-c3ccc(O)cc3</chem>                       | 21.9  | 7.5  |
| Z90124<br>734  | <chem>Nc1ncnc(c12)n(c(C)c2C)-c3ccc(Cl)cc3</chem>                      | 6.7   | 6.6  |
| Z90122<br>142  | <chem>Cc1ccc(cc1)-n(c(C)c2C)c(c23)ncnc3N</chem>                       | 8     | 14.7 |
| Z57455<br>905  | <chem>c1ccccc1-c2cn(-c3ccc(cc3)OC)c(c24)ncnc4N5CCOCC5</chem>          | -4.2  | 13.3 |
| Z56995<br>257  | <chem>s1cccc1-c(cc2C(F)(F)F)nc(c23)n(-c4ccccc4)nc3-c(cc5)ccc5C</chem> | -3.3  | 4.7  |



|                 |                                                                    |       |      |
|-----------------|--------------------------------------------------------------------|-------|------|
| Z56865<br>447   | n1ncn(c1c23)cnc2n(nc3)-c4cccc4                                     | -11.2 | 1.9  |
| Z56852<br>588   | c1cccc(c12)n(C)c(n2)-c3c(N)n(c(c34)c(=O)n(C)nc4[N+](O-)=O)C5CCCCC5 | -3.2  | 10.1 |
| Z28574<br>9166  | n1ncn(c1c23)cnc2n(nc3)-c(c4)ccc(Cl)c4Cl                            | -10   | 24.2 |
| Z10856<br>7154  | n1nnn(c1c23)c(C(F)(F)F)nc2n(nc3)-c4cc(Cl)ccc4                      | 4.5   | 5.5  |
| Z57455<br>935   | COCCNc1ncnc(c12)n(-c3ccc(F)cc3)cc2-c4cccc4                         | 15.9  | 10.4 |
| Z68088<br>3240  | O=C(O)c1cc(C2CC2)nc(c13)n(CCO)nc3-c4cccs4                          | 10.5  | 10.3 |
| Z57455<br>912   | COCCNc1ncnc(c12)n(-c3ccc(cc3)OC)cc2-c4cccc4                        | -3.7  | 15.3 |
| Z56763<br>501   | c1cccc1C(=S)Nc(c2-c3cccc3)n4nc(n(c4c25)CCCC5)-c6ccc(cc6)OC         | -7.9  | 10.9 |
| Z23757<br>6460  | N#Cc1cc([N+](O-)=O)c(cc1)Oc(cc2)ccc2-n(c(C)c3C)c(c34)ncn<br>c4N    | -0.4  | 2    |
| Z21131<br>1232  | CCNc1ncnc(c12)n(nc2)-c3cccc3                                       | 8.7   | 5.2  |
| Z22032<br>4560  | CCNc1ncnc(c12)n(nc2)-c3ccc(F)cc3                                   | 4.6   | 10   |
| Z12182<br>91815 | c1cccc(Cl)c1C(O)Cn2enc(c23)ncnc3NC                                 | 7.2   | 6.8  |
| Z23867<br>6528  | C1CCN1c2ncnc(c23)n(nc3)-c4cccc4                                    | 2.6   | 6.6  |
| Z56792<br>085   | FC(F)Oc(cc1)ccc1-c2cn3cc(n(c3c24)CCCC4)-c5cccc5                    | -3    | 10.5 |
| Z22040<br>4372  | C1CC1Nc2ncnc(c23)n(nc3)-c4cccc4                                    | 9.9   | 5.2  |
| Z22040<br>4374  | C1CC1Nc2ncnc(c23)n(nc3)-c4ccc(F)cc4                                | 18.4  | 14.9 |
| Z10411<br>14058 | COc(cc1)ccc1-n(nc2)c(c23)ncnc3NC4CC4                               | 22.7  | 10.1 |
| Z22040<br>3918  | OCCN(C)c1ncnc(c12)n(nc2)-c3cccc3                                   | 4.7   | 8.1  |

|                |                                                                    |       |      |
|----------------|--------------------------------------------------------------------|-------|------|
| Z92132<br>0356 | CCCN(C)c1ncnc(c12)n(nc2)-c3ccccc3                                  | 7.5   | 1.4  |
| Z56844<br>776  | [O-][N+](=O)c1nn(CC)c(=O)c(c12)n(C3CCCCC3)c(N)c2-c(n4)oc(c45)cccc5 | 1.6   | 3.8  |
| Z11843<br>8576 | C=CCNc1ncnc(c12)n(nc2)-c3ccccc3                                    | 10.3  | 7    |
| Z23490<br>4272 | O1CCCC1Cn(c(C)c2C)c(c23)ncnc3N                                     | 1.8   | 6.5  |
| Z57456<br>112  | CN1CCN(CC1)c2ncnc(c23)n(-c4cc(Cl)ccc4)cc3-c5ccccc5                 | 16.5  | 10.7 |
| Z57455<br>630  | c1ccccc1-c2cn(-c(cc3C)ccc3)c(c24)ncnc4N(CC5)CCN5C                  | 2.2   | 6.9  |
| Z56881<br>877  | c1cc(Cl)ccc1-c2c(C)sc3ncn(c4c23)cnn4                               | 0.7   | 6.4  |
| Z56792<br>993  | C1CCc(c12)n(-c(cc3C(F)(F)F)ccc3)c(C)c2-c4ccccc4                    | 16.7  | 3.8  |
| Z56776<br>346  | c1ccccc1-c(c2C#N)c(-c3ccccc3)n(c2NC(=O)C)C4CCCC4                   | 8.8   | 9.8  |
| Z57455<br>481  | COC(OC)CNc1ncnc(c12)n(-c3ccc(F)cc3)cc2-c4ccccc4                    | 21.7  | 4.3  |
| Z56801<br>378  | CCOC(=O)CCn(c(c12)ccc(C)c2)c(-c3ccccc3)c1-c4ccccc4                 | -5.2  | 2.9  |
| Z56844<br>779  | c1ccccc1CCn(c(c23)c(=O)n(CC)nc3[N+](O-)=O)c(N)c2-c(n4)sc(c45)cccc5 | 1     | 14.7 |
| Z56987<br>685  | CC(C)(C)c1ccc(cc1)-c2nn(-c3ccccc3)c(c24)NC(=O)CSC4c5ccc(Cl)cc5     | 7.9   | 3.4  |
| Z52590<br>800  | c1ccccc1-c2esc(c23)nc(C)nc3Nc(cc4)cc(c4OC)S(=O)(=O)N5CCOCC5        | 3.5   | 8.7  |
| Z44121<br>634  | n1ccnc1N(CC2)CCN2Cn(c(=S)s3)nc3Nc4ccc(cc4)Oc5ccccc5                | -14.3 | 10.4 |
| Z85937<br>709  | c1cc(O)ccc1Nc2nc(CN3CCOCC3)nc(c24)sc4-c5ccccc5                     | 9     | 9.2  |
| Z55730<br>373  | c1cc(Cl)ccc1-n(n2)c(cc2C)NC(=O)c3cccc(n3)N(CC4)CCN4c5ccc(cc5)OC    | -4.3  | 6    |
| Z56854<br>378  | CCOC(=O)c1c(-c(cc2)ccc2C)csc1Nc(n3)c(N(CC4)CCN4C)nc(c35)cccc5      | -8.5  | 5.2  |

|                 |                                                                        |       |      |
|-----------------|------------------------------------------------------------------------|-------|------|
| Z43241<br>9410  | c1cc(F)ccc1Nc(cc(n2)C)n(c23)nc(c3)-c4cc(OC)c(cc4)OC                    | 4.1   | 3.5  |
| Z71175<br>700   | COc(c1)ccc(OC)c1NC(=O)C(C)Sc(nc2NC)nc(c23)cccc3                        | 9.7   | 14   |
| Z31065<br>921   | COc1c(O)cc(cc1)Nc2nc(-c3ccnc3)nc(c24)cccc4                             | 1.8   | 4.1  |
| Z31613<br>0872  | n1ccnc1N(C2)CCCC2C(=O)Nc(n3)sc(c34)cc(cc4)Oc5cccc5                     | 8.5   | 19.8 |
| Z10136<br>95826 | c1cc(F)ccc1CNc(nc(c23)ncn3)nc2N4CCN(CC4)c5cccc5                        | 4.7   | 2.8  |
| Z85932<br>913   | c1cccc1-c(c2)sc(c23)ncnc3Nc4ccc(cc4)NS(=O)(=O)c(c5)ccc(c56)<br>)OCCCO6 | 0.6   | 10.2 |
| Z17931<br>156   | C1COCCN1c(cc2)ccc2NC(=O)C(C)Sc(ncn3)c(c34)sc(c4)-c5ccc(<br>F)cc5       | 6.9   | 9.9  |
| Z85926<br>118   | c1cccc1-n(n2)c(cc2C)Nc(c3Cl)nc(c(Cl)c3)N4CCN(CC4)c5ccc(c<br>c5)OC      | -4.1  | 3.9  |
| Z23865<br>3612  | c1cccc1NC(=O)CN(CC2)CCC2Nc3ncnc(c34)cc(Cl)cc4                          | 7.3   | 22.7 |
| Z56948<br>504   | c1cccc1-n(n2)c(cc2C)Nc(n3)c(N(CC4)CCN4C)nc(c35)cccc5                   | 4.4   | 7.9  |
| Z33287<br>4806  | n1ccnc1Nc(ccc2)cc2C(=O)Nc3ccc(nc3)N4CCCC4                              | -3.1  | 7.7  |
| Z52588<br>733   | CNC(=O)c1ccc(cc1)Nc2ncnc(c23)sc3-c4ccc(cc4)OC                          | 21.8  | 4.8  |
| Z43195<br>1354  | COc(cc1)c(OC)cc1-c2c(C)nn(c23)c(cc(n3)C)Nc4ccc(Br)cc4                  | 2.8   | 6.8  |
| Z12748<br>7484  | c1cccc1Nc2cc(ccc2)Nc(nc3)ccc3S(=O)(=O)N4CCOCC4                         | -10.7 | 9    |
| Z10411<br>14212 | Cc(c1)ccc(c1C)Nc2nc(nc(c23)ncn3)N(CC4)CCN4c5cccc5                      | 21.1  | 5.4  |
| Z82240<br>952   | CN1CCN(CC1)c(ccc(Cl)c2)c2NC(=O)c3ccc(cc3)-n4cncn4                      | 10.4  | 9.6  |
| Z43598<br>0478  | Cc1cc(ccc1)Nc(cc(n2)C)n(c23)nc(c3)-c4cc(OC)c(cc4)OC                    | -0.6  | 2    |
| Z43194<br>7114  | CC(=O)Nc1ccc(cc1)Nc(cc(n2)C)n(c23)nc3-c4c(OC)cccc4                     | 2.6   | 22.2 |

|                 |                                                                               |      |      |
|-----------------|-------------------------------------------------------------------------------|------|------|
| Z10411<br>13928 | <chem>c1cccc(OC)c1N2CCN(CC2)c(nc(c34)ncn4)nc3Nc5cccc5</chem>                  | 26.2 | 4.2  |
| Z11851<br>5262  | <chem>COc(cc1)cc(OC)c1Nc(nc2)ccc2-c(n3)[nH]c(c34)cccc4</chem>                 | 0.1  | 3.9  |
| Z44500<br>8618  | <chem>CNc(nc1)ccc1Nc2nc(C)nc(c23)sc3-c4cc(OC)c(cc4)OC</chem>                  | -6.5 | 4.7  |
| Z31124<br>105   | <chem>CC(=O)Nc(c1)ccc(OC)c1Nc2ncnc(c23)sc3-c4ccc(cc4)OC</chem>                | 8.8  | 4.7  |
| Z56765<br>335   | <chem>c1cc(O)c(OC)cc1/C=N/Nc2nc(C)nc(c23)n(nc3)-c4cccc4</chem>                | 13   | 2.3  |
| Z43241<br>9392  | <chem>Cc1ccc(cc1)Nc(cc(n2)C)n(c23)nc(c3)-c4cc(OC)c(cc4)OC</chem>              | -4.8 | 9.1  |
| Z57243<br>864   | <chem>c1cccc(c12)nc(-c3c(O)c(OC)ccc3)nc2N4CCN(CC4)c5cccc5</chem>              | -0.9 | 3.9  |
| Z10411<br>13922 | <chem>Cc(c1)ccc(c1C)Nc2nc(nc(c23)ncn3)N(CC4)CCN4c5cc(Cl)ccc5</chem>           | 12.1 | 6.4  |
| Z44082<br>4940  | <chem>c1ccc(Cl)cc1Nc(cc(n2)C)n(c23)nc(c3)-c4cc(OC)c(cc4)OC</chem>             | 9.6  | 4.2  |
| Z56851<br>745   | <chem>COc(cc1)cc(OC)c1Nc(nc(c23)ccc(C)c3)nc2-c4cccc4</chem>                   | -4.9 | 2.8  |
| Z99205<br>4424  | <chem>c1cccc1-c2nc(nc(c23)ccc(C)c3)Nc4c(OC)ccc(c4)OC</chem>                   | 15.1 | 11.3 |
| Z11495<br>6180  | <chem>COCCNC(=O)c1cc(ccc1)Nc(nc(c23)ccc(Cl)c3)nc2-c4cccc4</chem>              | 26.7 | 7.2  |
| Z16382<br>483   | <chem>C1COCCN1c(cc2)ccc2NC(=O)C(C)Sc3ncnc(c34)n(nc4)-c5cccc5</chem>           | 13.6 | 9.2  |
| Z11852<br>3160  | <chem>n1enn(c12)c(cc(n2)C)Nc3ccc(cc3)NS(=O)(=O)c(c4)ccc(c45)OC<br/>CO5</chem> | -0.6 | 3    |
| Z13854<br>12515 | <chem>OCC(=O)Nc1cc(ccc1)Nc2ncnc(c23)cc(F)c(F)c3</chem>                        | -6.2 | 6.2  |
| Z56878<br>976   | <chem>c1cccc(OC)c1Nc2nc(-c3c(O)ccc3)nc(c24)cccc4</chem>                       | 1.2  | 6.2  |
| Z57030<br>677   | <chem>COc(cc1)ccc1-c2csc(n2)NC(=O)c3ccc(cc3)Nc4ncnc(c45)cccc5</chem>          | 14.2 | 8.8  |
| Z20235<br>156   | <chem>C1COCCN1c(cc2)ccc2NC(=O)C(C)Sc3nc(C)nc(c34)sc(c4)-c5ccc5</chem>         | 8.9  | 10.8 |

|                 |                                                                                     |       |      |
|-----------------|-------------------------------------------------------------------------------------|-------|------|
| Z57243<br>854   | <chem>Cc1ccc(cc1)Nc2nc(-c3c(O)c(OC)ccc3)nc(c24)cccc4</chem>                         | 12    | 6.6  |
| Z72905<br>5996  | <chem>CNc(nc1)ccc1Nc2nc(-c3cccnc3)nc(c24)cccc4</chem>                               | 13.4  | 5.4  |
| Z19316<br>079   | <chem>CCN(CC)c1ccc(cc1)NC(=O)CSc2ncnc(c23)cccc3</chem>                              | -2.6  | 8.9  |
| Z56880<br>410   | <chem>O=C(O)c1cc(ccc1)NC(=O)CC(C(=O)N2)Sc(c23)ccc(C(F)(F)F)c3</chem>                | 3.6   | 4.9  |
| Z57393<br>621   | <chem>c1cccc(c12)NC(=O)C\2=N\NC(=O)c3cc(n[nH]3)-c4cccc(c45)cc5</chem>               | 22.3  | 12.6 |
| Z57172<br>312   | <chem>O=C(O)c1cc(ccc1)CN2C(=O)SC(C2=O)Nc(ccc3)cc3C(=O)O</chem>                      | 7.8   | 11.5 |
| Z16662<br>9440  | <chem>O=C(O)CCC(C(=O)O)NC(=O)c1ccc(cc1)NCc(n2)enc(c23)nc(N)[nH]c3=O</chem>          | 17.3  | 5    |
| Z32113<br>3248  | <chem>NC(=O)CSCCC(=O)Nc(s1)nc1Cc2cc(OC)ccc2</chem>                                  | -5.7  | 8.7  |
| Z56123<br>802   | <chem>c1cccc(c1C(=O)O)NS(=O)(=O)c(ccc2)cc2NS(=O)(=O)c(cc3)cc(c34)oc(=O)[nH]4</chem> | 23.2  | 11.8 |
| Z36569<br>1418  | <chem>[O-][N+](=O)c(c1)ccc(c12)[nH]nc2C(=O)Nc(c3)ccc(F)c3C(=O)OC</chem>             | -2.2  | 10   |
| Z18475<br>190   | <chem>c1cc(F)ccc1C(=O)CCC(=O)OCC(=O)c(c2)ccc(c23)[nH]c(=O)[nH]3</chem>              | 12.2  | 10.9 |
| Z56801<br>861   | <chem>Cc(n1)sc1CC(=O)c2c(O)cc(cc2)OCC3C(O)C(O)C(O)C(O3)CO</chem>                    | -3.6  | 8.1  |
| Z14811<br>82175 | <chem>C1COCCN1C(=O)COc(cc2)c(OC)cc2CNc(ccc3)cc3-c4c[nH]4</chem>                     | 22.9  | 3.3  |
| Z29563<br>5132  | <chem>C1CC(=O)Nc(c12)ccc(c2)OCC(=O)NCCCN3CCN(CC3)c4ncccc4</chem>                    | -3.2  | 5.3  |
| Z36569<br>8030  | <chem>[O-][N+](=O)c(c1)ccc(c12)[nH]nc2C(=O)NCc3c(cccc3)Cn4ccnc4</chem>              | -15.1 | 3.9  |
| Z23016<br>3214  | <chem>Cc1c(S(=O)(=O)N)cc(cc1)NC(=O)c2cc(n[nH]2)-c(cc3)ccc3C</chem>                  | -8    | 8    |
| Z37273<br>1156  | <chem>c1cccc(Cl)c1C(CC(=O)O)NC(=O)c2cc([nH]n2)C3CC3</chem>                          | 0.6   | 12.2 |
| Z11312<br>29863 | <chem>c1cccc(COC)c1C(=O)Nc([nH]n2)cc2-c3c(OC)cccc3</chem>                           | 14    | 12.1 |

|                 |                                                                                    |       |      |
|-----------------|------------------------------------------------------------------------------------|-------|------|
| Z16202<br>871   | <chem>c1cccc(c12)NC(=O)C(C)(C)N2C(=O)CN3C(=O)NC(C3=O)Cc4c[nH]c(c45)cccc5</chem>    | 13.7  | 6.1  |
| Z15148<br>24214 | <chem>o1cccc1C2NC(=O)NC(=C2C(=O)OCC)CN(C(CO)C3CC3)Cc4cccc4</chem>                  | 19.5  | 4.1  |
| Z18544<br>371   | <chem>c1cccc(c12)[nH]nc2C(=O)OCc3cc(=O)oc(c34)cc(O)cc4</chem>                      | 8.2   | 11.6 |
| Z13709<br>92736 | <chem>o1cccc1C(O)CN(C(=O)c2c(C)[nH]nc2)Cc3cccc3</chem>                             | 2.1   | 4.6  |
| Z33990<br>1228  | <chem>n1ccnc1Nc(ccc2)cc2C(=O)N(CC)Cc([nH]c3=O)nc(c34)cc(OC)c(c4)OC</chem>          | -6.1  | 14.2 |
| Z13358<br>51916 | <chem>c1cccc1Cc2cc(c(O)cc2)NS(=O)(=O)c3c[nH]c(c34)nccc4</chem>                     | 17.7  | 11.6 |
| Z80564<br>9870  | <chem>c1cccc1-c([nH]2)cc2CCCN(C)S(=O)(=O)c(c3)ccc(c34)[nH]c(=O)[nH]c4=O</chem>     | 16.4  | 9.5  |
| Z46301<br>142   | <chem>c1cccc(c12)NC(=O)CN2C(=O)CN(CC)Cc([nH]c3=O)nc(c34)ccc c4</chem>              | 4.1   | 9.8  |
| Z40199<br>5242  | <chem>c1cc(F)ccc1-c([nH]c2)c2CNCC3(CCOCC3)c4cccc4</chem>                           | -16.8 | 20.7 |
| Z14036<br>74537 | <chem>c1ccnc(c12)[nH]cc2CC(=O)NCC(O)COc(cc3C)ccc3</chem>                           | -9.3  | 5.2  |
| Z82730<br>3042  | <chem>c1cc(F)ccc1CC(C(=O)N)CNC(=O)c2cc([nH]n2)-c3ccc(F)cc3</chem>                  | 0.6   | 11.4 |
| Z11351<br>45466 | <chem>c1cccc(c12)n(cn2)CC(c3ccc(F)cc3)NCc4c(C)n[nH]c4</chem>                       | 2.7   | 7.6  |
| Z57456<br>069   | <chem>OCCNc1ncnc(c12)n(-c3ccc(Cl)cc3)cc2-c4cccc4</chem>                            | -9.3  | 12.3 |
| Z80908<br>8424  | <chem>O=c1[nH]c(=O)[nH]c(c12)ncc(c2)C(=O)N(C)CCCCc3cc(n[nH] ]3)-c4ccc(F)cc4</chem> | 22.9  | 8.2  |
| Z92736<br>3860  | <chem>FC(F)(F)c1cc(c(=O)[nH]c1)NC(=O)CC2C(=O)Nc(c23)cccc3</chem>                   | 18.6  | 13.5 |
| Z75803<br>9314  | <chem>n1ccnc1NCCC(=O)NCc2cc(ccc2)NC(=O)c3ccccn3</chem>                             | 12.4  | 8.1  |
| Z16151<br>137   | <chem>N1CCC/C1=N/S(=O)(=O)c(ccc2)cc2NC(=O)COC(=O)c3c(cccc3 )NCc4ccco4</chem>       | 10    | 10.3 |
| Z23934<br>2080  | <chem>Cn1ccnc1C(c2cccc2)NC(=O)c3cc(n[nH]3)-c4ccc(Br)cc4</chem>                     | 13.4  | 11.5 |

|                 |                                                                    |       |      |
|-----------------|--------------------------------------------------------------------|-------|------|
| Z99208<br>0264  | <chem>c1cnc(O)cc1CNC(=O)CCc2ncc(o2)-c3ccccc3</chem>                | -12.7 | 7.6  |
| Z68340<br>575   | <chem>c1cccc(c12)cc(O)c(c2)C(=O)NNC(=O)c3c(O)nc3</chem>            | 17.3  | 8.3  |
| Z56772<br>943   | <chem>c1cccc(c1C(=O)O)Nc(cc2C(=O)O)nc(n2)Nc(c3C(=O)O)cccc3</chem>  | 3.6   | 7.3  |
| Z65321<br>3378  | <chem>CC(C)c([nH]n1)cc1C(=O)NCc2c(nc2)OCc3ccccc3</chem>            | -6.3  | 10.5 |
| Z22541<br>6380  | <chem>Cc1ccc(cc1)-c(n[nH]2)cc2C(=O)NCc3c(ccc3)Cn4cccn4</chem>      | -5.7  | 2    |
| Z36823<br>4966  | <chem>c1ccc(NC(=O)N)cc1NC(=O)c2cc([nH]n2)-c3cc(Cl)ccc3</chem>      | 6.8   | 3.3  |
| Z56773<br>235   | <chem>O=C(O)c1cc(ccc1)Nc2ccnc(n2)Nc(ccc3)cc3C(=O)O</chem>          | -2.6  | 6.5  |
| Z80690<br>6560  | <chem>c1ccnc(O)c1C(=O)NC2CCCOc(c23)ccc(F)c3</chem>                 | 19.8  | 3.4  |
| Z12420<br>32187 | <chem>c1n[nH]c(c12)CCN(C2)C(=O)c3c(O)ccc(c3)OCc4ccccc4</chem>      | 20.7  | 7.9  |
| Z21132<br>1404  | <chem>Cc1ccc(cc1)-c(n[nH]c2)c2CNCCc3cc(OC)c(cc3)OC</chem>          | 12.1  | 11.1 |
| Z89761<br>882   | <chem>c1ccccc1C(=O)CCC(=O)OCc2nc(nc(n2)N)Nc3ccccc3</chem>          | 19.6  | 11   |
| Z57101<br>386   | <chem>O=C(O)c1ccc(cc1)Nc2ncnc(c23)n(nc3)C4ccccc4</chem>            | 14    | 6.8  |
| Z14444<br>63148 | <chem>c1ccccc1C(C)(C(=O)O)NC(=O)Cc2n[nH]c(c23)cccc3</chem>         | 26.3  | 2.9  |
| Z63517<br>1180  | <chem>c1ccc(OC)cc1-c(n[nH]c2)c2CNCCc3c(ccc3)Cn4cncn4</chem>        | -3.7  | 9.2  |
| Z56865<br>652   | <chem>c1cc(Cl)ccc1C(=O)C2=C(O)C(=O)N(CCOC)C2c3cc(OC)c(O)cc3</chem> | -1.4  | 3.2  |
| Z40813<br>6442  | <chem>C1CCCC1C(c2cccs2)NC(=O)c3n[nH]c(c34)ccc(c4)[N+](O-)=O</chem> | 3.5   | 9.4  |
| Z23762<br>5012  | <chem>c1cccc(c12)NC(=O)CN2C(=O)CCC(C3)C(=O)Nc(c34)cccc4</chem>     | 17.8  | 13.6 |
| Z36509<br>4382  | <chem>CN(C)Cc1cc(ccc1)CN/C=C\2C(=O)NC(=O)c(c23)cccc3</chem>        | 20.8  | 12.5 |

|                 |                                                                     |       |      |
|-----------------|---------------------------------------------------------------------|-------|------|
| Z10195<br>61132 | CC1CN(CC(O1)C)C(=O)C(=O)Nc(c(=O)[nH]c2)cc2C(F)(F)F                  | 11.8  | 10.5 |
| Z31869<br>9644  | CCCc(n[nH]1)cc1C(=O)Nc(c2)ccc(Cl)c2C(=O)N                           | 18.8  | 12.2 |
| Z64730<br>6402  | c1cccc(Cl)c1C(CC(=O)O)NC(=O)c2c(=O)[nH]c(C)cc2                      | 0.4   | 3.1  |
| Z23705<br>7236  | COc(cc1)ccc1-c(n[nH]c2)c2C(=O)NNc(n(c3=O)CC)nc(c34)cccc<br>4        | 10.7  | 10.7 |
| Z50753<br>5496  | FC(F)(F)c1cc(c(=O)[nH]c1)NC(=O)CCc2c(C)nc[nH]c2=O                   | 22.8  | 10.7 |
| Z56774<br>535   | O=C(O)c1cc(ccc1)NC(=O)CC(C(=O)N2)Nc(c23)cc(C)c(C)c3                 | 14.7  | 7.2  |
| Z21746<br>9786  | CCOC(=O)C(C(=O)OCC)NC(=O)CC(C(=O)N1)Sc(c12)ccc(Cl)c<br>2            | -2.4  | 15   |
| Z65321<br>4180  | c1cc(C)[nH]c(=O)c1C(=O)NCc2c(nc2)OCc3cccc3                          | 2.1   | 8.9  |
| Z11739<br>66611 | CCC(C)C(C(=O)OC)NC(=O)c(c1)enc(c12)n[nH]c2C                         | 10.3  | 2.6  |
| Z92838<br>8106  | O=C(O)c1cc(ccc1)NC(=O)c2cc([nH]n2)C3CC3                             | -15.5 | 11.3 |
| Z24427<br>216   | COc(c1)ccc(O)c1C(=O)OCC(=C2C(=O)OCC)NC(=O)NC2CC                     | 8.1   | 5    |
| Z11289<br>87919 | CCCc(n[nH]1)cc1C(=O)NC(c2nc(C)[nH]n2)c3cccc3                        | 13.5  | 8.4  |
| Z15517<br>071   | CC(=O)c1c(C)c([nH]c1C)C(=O)OCC(=O)Nc(cccc2)c2C(=O)Nc3<br>cccc3      | 8.1   | 12.2 |
| Z10395<br>10912 | FC(F)(F)c1cc(c(=O)[nH]c1)NC(=O)c(c2)c(O)cc(c23)OCO3                 | 25.3  | 4.4  |
| Z15517<br>598   | CC(=O)c1c(C)c([nH]c1C)C(=O)OCC(=O)NC(C)c2cccc2                      | 9.6   | 18.8 |
| Z77730<br>7318  | CC(C)c1nc([nH]n1)-c2c(cccc2)NC(=O)c3cc(ccc3)OCc(n4)cn(c4<br>5)cccc5 | -19.8 | 9.9  |
| Z64517<br>9942  | CC1CN(CC(O1)C)c(nc2)ccc2CNc(n(c34)ncn3)cc(n4)-c5cccc5               | 18.5  | 8.6  |
| Z85210<br>5782  | N1CCN(C1=O)c(cc2)ccc2NC(=O)c3cc(C4CC4)nc(c35)n(nc5C)-<br>c6cccc6    | -11.7 | 7.8  |



|                 |                                                                     |       |      |
|-----------------|---------------------------------------------------------------------|-------|------|
| Z90623<br>596   | c1cccn(c12)c(nn2)CNCc3c(-c4c(OC)ccc(c4)OC)nn(c3)-c5ccccc5           | -9.2  | 8.5  |
| Z98116<br>2044  | c1cccc(c12)c(=O)n(C(C)C)nc2C(=O)Nc3ccc(nc3)Nc4ccccc4                | -7.4  | 7.3  |
| Z81658<br>8536  | Cc1c[nH]c(=O)n1-c(cc2)ccc2C(=O)Nc3c(nc3)Oc4ccc(C)c4C                | 11.1  | 13.1 |
| Z14244<br>34795 | c1ccccc1-c(nc(c23)n(C(C)C)nc2)cc3C(=O)Nc(cc4)ccc4Cc5nnn[nH]5        | 5.4   | 4.6  |
| Z22508<br>4586  | CC(C)n(nc1)c(c12)nc(-c(c3C)cccc3)cc2C(=O)Nc(ccc4)cc4-c5nnn[nH]5     | -0.3  | 11.7 |
| Z16139<br>74092 | c1cccc(c12)nc(-c3ccncc3)cc2C(=O)Nc(c4)ccc(c45)[nH]c(CC)cc5=O        | -10.8 | 6.8  |
| Z91653<br>0322  | c1ccccc1-c(nc(c23)n(C(C)C)nc2)cc3C(=O)NCc4ccc(cc4)-c5nnn[nH]5       | -11.9 | 6    |
| Z78603<br>8522  | c1nccn1CCC(=O)Nc(ccc2)cc2C(=O)Nc(s3)nc(c3C)-c4ccc(F)cc4             | -17.4 | 5.9  |
| Z23708<br>7286  | c1ccnc(c12)c(ccc2)NC(=O)c3ccc(cc3)OCc(n4)cn(c45)cccc5C              | -3.6  | 4.9  |
| Z46028<br>6118  | c1cc(F)cc(Br)c1Oc(nc2)cc2C(=O)Nc(c3)enc(c34)n(C)nc4C                | 14.1  | 6.3  |
| Z64515<br>2226  | COc(cc1)c(O)cc1CNe2ncnc(c23)sc3-c4ccc(cc4)OC                        | -5.5  | 7    |
| Z26177<br>2600  | c1n[nH]c(c12)ccc(c2)NC(=O)c3ccc(cc3)-n(c4=O)c(C)nc(c45)ccc5         | 11.7  | 11.1 |
| Z24069<br>2216  | CN(C)c(cc1)ccc1C(=O)Nc(s2)nc(-c3ccccc3)c2-c4nccn4C                  | 4.7   | 12.8 |
| Z55701<br>717   | c1n[nH]c(c12)cc(cc2)Nc(n3)c(nc(c34)cccc4)NS(=O)(=O)c(c5F)c(c(F)cc5) | 1.7   | 8.2  |
| Z78602<br>8994  | c1nccn1CCC(=O)Nc(ccc2)cc2C(=O)Nc(c3)ccc4n(CC)c(c5c34)ccc5           | -7.3  | 10.2 |
| Z85640<br>7970  | n1ccccc1-n(c(C)c2)c(C)c2C(=O)Nc(c3C)ccc(c3)Oc4nccn4                 | -8.5  | 4.9  |
| Z94077<br>3446  | c1cc(Br)ccc1C(O)C(C)Nc2nc(-c3ccncc3)nc(c24)cccc4                    | 2.4   | 5.3  |
| Z31225<br>677   | c1cccc(c12)nc(-c3ccncc3)nc2Nc4ccc(cc4)N5CCOCC5                      | 8.5   | 6    |

|                 |                                                                   |       |      |
|-----------------|-------------------------------------------------------------------|-------|------|
| Z14591<br>40404 | c1cc(F)ccc1-c(nc(c23)cccc3)cc2C(=O)Nc4ccnn4-c(nn5)ccc5C           | -6.8  | 5    |
| Z11577<br>25078 | COc(cc1)ccc1CNc(nc(c2c34)cc(OC)c(c2)OC)n4nc(n3)-c5ccnc5           | 11.3  | 8.7  |
| Z10411<br>13992 | Cc1c(C)ccc(c1)-n(nc2)c(c23)ncnc3Nc4ccc(cc4)Oc5ccccc5              | 19.5  | 12   |
| Z91411<br>0990  | CN(C)c1ccc(nc1)NC(=O)c2c(C)n(c(C)c2)-c(c3)ccc(c34)OCCO4           | -8.7  | 3.6  |
| Z11577<br>25081 | c1ccccc1CN(C)CCCNc(nc(c2c34)cc(OC)c(c2)OC)n4nc(n3)-c5ccnc5        | 4.3   | 9.1  |
| Z10411<br>14046 | Cc1c(Cl)cc(cc1)-n(nc2)c(c23)ncnc3Nc4ccc(cc4)Nc5ccccc5             | 13.9  | 5.3  |
| Z31244<br>267   | COc(nc1)ccc1Nc2nc(-c3ccnc3)nc(c24)cccc4                           | 13.2  | 7.4  |
| Z11653<br>02444 | c1cccc(OC)c1CNc(nc(c2c34)cc(OC)c(c2)OC)n4nc(n3)-c5ccnc5           | -16.4 | 7.9  |
| Z10136<br>95848 | c1ccccc1CNc2nc(nc(c23)ncn3)Nc(cc4OC)cc(OC)c4OC                    | 8.1   | 13   |
| Z15446<br>63259 | c1cccc(c12)[nH]c(n2)/C=N/Nc(nc(c34)cc(C)cc4)nc3-c5ccccc5          | -4.9  | 12.6 |
| Z15417<br>46259 | Cc1nnn1-c(ccc2)cc2NC(=O)c3cc(OC)c(c(c3)OC)OCc4ccccc4              | -16.3 | 10.8 |
| Z31811<br>6494  | C1COCCN1c(ncce2)c2C(=O)Nc(n3)sc3-c(cc4C(F)(F)F)ccc4               | -24.9 | 7.2  |
| Z95259<br>4020  | C1CCCC1NC(=O)Cn(c2)nce2NC(=O)c3cc(-c4ccccc4)c(s3)N5C<br>COCC5     | 8.2   | 8.3  |
| Z15134<br>92613 | n1c[nH]c(c12)ccc(c2)C(=O)N3CCN(CC3)c4nc(-c5ccnc5)nc(c4<br>6)cccc6 | -14.7 | 8.5  |
| Z15287<br>39220 | n1ncn(C)c1-c2cc(nc2)NCc3c(-c4ccc(F)cc4)nn(c3)-c5ccccc5            | 6.2   | 15.3 |
| Z49539<br>457   | Cc1cc(C)nc(n1)N\N=C\c2c(-c(c3)ccc(c34)OCCO4)nn(c2)-c5cc<br>ccc5   | 9.7   | 4.5  |
| Z14109<br>12518 | CCOC(=O)c1c(ncce1)NC(=O)c2cc(-c3ccccc3)nc(c24)n(C)nc4C            | -1.5  | 6    |
| Z10411<br>14040 | Cc1c(Cl)cc(cc1)-n(nc2)c(c23)ncnc3Nc4ccc(cc4)Oc5ccccc5             | 13.8  | 11.8 |

|                 |                                                                             |       |      |
|-----------------|-----------------------------------------------------------------------------|-------|------|
| Z10411<br>13994 | <chem>Cc1c(C)ccc(c1)-n(nc2)c(c23)ncnc3Nc4ccc(cc4)Oc5ccc(Cl)cc5</chem>       | 11    | 8    |
| Z11577<br>25082 | <chem>Cc1cc(ccc1)N(CC)CCCNc(nc(c2c34)cc(OC)c(c2)OC)n4nc(n3)-c5ccnc5</chem>  | -0.8  | 12.3 |
| Z75013<br>7620  | <chem>c1cccc(c12)n(C)c(c2Cl)C(=O)Nc3ccc(nc3)Oc(cc4)c(OC)cc4C</chem>         | -2.5  | 12.3 |
| Z14360<br>83684 | <chem>Cc1cnc(nc1)NC(=O)Cc2c(C)n(c(c23)ccc(c3)OC)C(=O)c4ccc(Cl)cc4</chem>    | -2.6  | 6.9  |
| Z10035<br>5784  | <chem>c1cc(N)ccc1C(\C)=N/Nc2ncnc(c23)sc3-c4ccc(F)cc4</chem>                 | 17.8  | 9.4  |
| Z16250<br>59400 | <chem>c1nc(C)ccc1\C=C\C(=O)Nc(c2C)c(ccc2)-c(n3C(C)C)nc(c34)ccc(F)c4</chem>  | -5.3  | 12.4 |
| Z96901<br>5972  | <chem>Cc(n1)n(C)c(c12)ccc(c2)C(=O)Nc(c3C)cccc3NC(=O)c4cccc4</chem>          | -0.3  | 9.3  |
| Z86317<br>498   | <chem>Nc1[nH]nc(c1C#N)CCCNc2nc(-c3ccnc3)nc(c24)cccc4</chem>                 | 6.5   | 6.3  |
| Z16002<br>408   | <chem>CC(=O)c1cc(ccc1)NC(=O)CSc(n2-c3c(F)cccc3)nnc2-c4c(Cl)cccc4</chem>     | 1.7   | 5.1  |
| Z78598<br>3240  | <chem>c1cccc(c2=O)c1n(c(c23)cccc3)CC(=O)Nc4c(ccc(F)c4)NC(=O)c5ccccn5</chem> | -14   | 3.7  |
| Z21712<br>6442  | <chem>c1cccc1Nc(nc(n2)N)nc2C(\C#N)=C/c3c(-c4ccnc4)nn(c3)Cc5cccc5</chem>     | 9.1   | 3.7  |
| Z92730<br>6062  | <chem>O=c1[nH]enc(c12)ccc(c2)NC(=O)c3c(nc3)SCc4ccc(F)cc4</chem>             | -13.9 | 10.9 |
| Z90537<br>512   | <chem>c1cc(O)ccc1C(O)C(C)NCc2ccc(o2)-c(n3)sc(c34)cccc4</chem>               | 10.4  | 7.1  |
| Z31372<br>202   | <chem>c1cccc(Cl)c1COCC(O)CNCCNCC(O)COCc2c(Cl)cccc2</chem>                   | 13.4  | 8.7  |
| Z12483<br>1322  | <chem>c1cccc1CNC(=O)NC(=O)C(C)NCC(c2cccc2)c3c[nH]c(c34)ccc4</chem>          | -0.9  | 3.9  |
| Z57110<br>353   | <chem>c1cccc1CNCC(O)COc2ccc(cc2)OCC(O)CNCc3cccc3</chem>                     | 8.3   | 9.9  |
| Z13739<br>44652 | <chem>Cc1c(Cl)cc(cc1)NC(=O)c2c(nc2)Oc(c3C(=O)N)cccc3</chem>                 | 4.6   | 5.2  |
| Z73980<br>1546  | <chem>Fc1c(Cl)cc(cc1)NC(=O)CNc2c(ccc2)N(CC3)CCC3O</chem>                    | 15.4  | 7.7  |

|                 |                                                                             |       |      |
|-----------------|-----------------------------------------------------------------------------|-------|------|
| Z10608<br>5620  | <chem>c1cccc(c12)nc(n(c2=O)CC(=O)N)CNC(C)c(c3)ccc(c34)cccc4</chem>          | 1     | 6.8  |
| Z60626<br>8776  | <chem>c1cccc(c12)[nH]c(n2)C(Cc3ccc(O)cc3)NC(=O)COc(c4)ccc(c45)CCC5</chem>   | -27   | 5.8  |
| Z12620<br>4244  | <chem>Fc1c(Cl)cc(cc1)NC(=O)C(C)N(CC2)CCC2C(=O)Nc3c(O)cccc3</chem>           | 1     | 19.9 |
| Z14316<br>45389 | <chem>Fc1c(Cl)cc(cc1)NC(=O)CNc2c(ccc(Cl)c2)N(CC3)CCC3CO</chem>              | 7.8   | 11.5 |
| Z21132<br>1200  | <chem>c1cccc(c12)[nH]cc2CCNCc3c(Br)cc(cc3)OCCO</chem>                       | -12.4 | 19   |
| Z25766<br>533   | <chem>Fc1c(Cl)cc(cc1)NC(=O)Cn(c(c23)cccc2)c(n3)NCC(C)O</chem>               | 7.5   | 2.8  |
| Z44584<br>637   | <chem>O1COc(c12)ccc(c2)CNC(=O)NCC3CC(CCC3)CNC(=O)NCc(c4)ccc(c45)OCO5</chem> | -0.7  | 13   |
| Z12620<br>1948  | <chem>c1cc(F)ccc1NC(=O)C(C)N(CC2)CCC2C(=O)Nc3c(O)cccc3</chem>               | 2.9   | 6.1  |
| Z94066<br>9346  | <chem>c1ccc(Cl)cc1NC(=O)NC(C)C(O)c2ccc(Br)cc2</chem>                        | -1.7  | 7.4  |
| Z29587<br>0622  | <chem>c1ccc(F)cc1NC(=O)C(C)Nc(ccc2)cc2NC(=O)Nc3ccccc3</chem>                | -2.5  | 8.7  |
| Z42515<br>1240  | <chem>c1cccc1-n2c(=S)[nH]cc2C(=O)NC(C)c3ccc(cc3)NC(=O)Nc4ccc(cc4)</chem>    | 8.6   | 12.1 |
| Z73980<br>1234  | <chem>c1c(Cl)ccc(F)c1NC(=O)CNc2c(cccc2)N(CC3)CCC3O</chem>                   | 8.2   | 7.5  |
| Z44571<br>697   | <chem>c1cccc1C(=O)Nc2c(OC)cc(c(c2)OC)NC(=O)Nc3cc(Cl)ccc3</chem>             | 2.7   | 7.1  |
| Z35618<br>2964  | <chem>n1c[nH]c(c12)ccc(c2)C(c3ccccc3)NC(=O)NCC(O4)COc(c45)ccc(c5)</chem>    | 5.4   | 5    |
| Z64805<br>8210  | <chem>c1cc(F)ccc1NC(=O)NC2CCN(CC2)CC(O)c(c3)ccc(c34)OCO4</chem>             | 2.1   | 7.8  |
| Z30701<br>269   | <chem>c1cccc(c12)[nH]c(n2)C(C(C)C)NC(=O)C(C)NC(=O)Nc3ccccc3</chem>          | 9.2   | 6.5  |
| Z86105<br>202   | <chem>Cc1cc(ccc1)NC(=O)CCCS(nc2N)nc3sc(c4c23)CCCC4</chem>                   | 5.8   | 4.9  |
| Z79823<br>7180  | <chem>s1cccc1C(CC)NC(=O)NCc2cc(ccc2)NC(=O)Nc(cc3C)ccc3</chem>               | 19.7  | 13.9 |

|                 |                                                                         |      |      |
|-----------------|-------------------------------------------------------------------------|------|------|
| Z29395<br>265   | <chem>c1cccc(c12)[nH]c(n2)C(CCSC)NC(=O)CCCc3c[nH]c(c34)cccc4</chem>     | 14.6 | 9.2  |
| Z38152<br>7500  | <chem>Clc1c(Cl)ccc(c1)NC(=O)NCC(O)c2c(OC)ccc(c2)OC</chem>               | -0.9 | 1.3  |
| Z25458<br>6188  | <chem>c1cccc(OC(F)F)c1C(=O)Nc2ccc(cc2)NC(=O)Nc3ccccc3</chem>            | 5.3  | 14.1 |
| Z12620<br>1836  | <chem>Cc1cc(ccc1)NC(=O)C(C)N(CC2)CCC2C(=O)Nc3c(O)cccc3</chem>           | 18.5 | 12.2 |
| Z44589<br>929   | <chem>CN(C)c1ccc(cc1)NC(=O)NCC2CC(CCC2)CNC(=O)Nc(cc3)ccc3N(C)C</chem>   | -7.6 | 8.3  |
| Z14511<br>84493 | <chem>CC(C1)C1C(=O)Nc(cc2)ccc2C(=O)NC3CCCN(C3)Cc4c(O)ccc(Cl)c4</chem>   | -2.7 | 9.4  |
| Z11683<br>33976 | <chem>c1cccc1NC(=O)Nc2cccc(c23)CN(CC3)CC(O)Cn4cccn4</chem>              | 14.8 | 13.3 |
| Z25457<br>8176  | <chem>COc(cc1)ccc1CC(=O)Nc2ccc(cc2)NC(=O)Nc3ccccc3</chem>               | 3.4  | 19.4 |
| Z73272<br>361   | <chem>C1COCCN1c(ccc(Cl)c2)c2NC(=O)c3ccc(cc3)NC(=O)Nc4ccccc4</chem>      | 8.4  | 4.3  |
| Z13235<br>75136 | <chem>C1CC1NC(=O)C2CCCN2C(=O)Nc(c3C)cc(cc3)NC(=O)Nc4ccc cc4</chem>      | 23.6 | 17.7 |
| Z74424<br>0036  | <chem>Cc1cc(ccc1)OCCNC(=O)NC(Cc2ccc(O)cc2)c(n3)[nH]c(c34)cccc4</chem>   | 4.9  | 6.1  |
| Z24068<br>2516  | <chem>c1cccc(c12)n(C)cc2C(=O)Nc3cc(ccc3)NC(=O)Nc4ccccc4</chem>          | -8.2 | 11.4 |
| Z16962<br>8894  | <chem>c1cccc1CNC(=O)NCC(=O)NCC(c2c(Cl)cccc2)c3c[nH]c(c34)ccc cc4</chem> | 21.3 | 17.7 |
| Z28715<br>8648  | <chem>O1CCCC1C(=O)Nc(ccc2)cc2C(=O)NCC(c3cccs3)c4c[nH]c(c45)cccc5</chem> | 3.1  | 14.8 |
| Z64716<br>4240  | <chem>FC(F)(F)c1ccc(cc1)NC(=O)CN(c(c23)cccc2)C(C)CC3C(=O)N</chem>       | -3.2 | 8.7  |
| Z23658<br>5140  | <chem>o1cccc1C(=O)Nc(cc2)ccc2CNC(=O)NC3CCN(C(C)C)CC3</chem>             | 6.8  | 13.6 |
| Z43357<br>4908  | <chem>c1cccc1C(=O)Nc(c2)ccc(c2C(F)(F)F)NC(=O)NC3CCCC3</chem>            | -7.8 | 5.1  |
| Z24099<br>5548  | <chem>COc(cc1)ccc1NC(=O)CC(C(=O)Nc(c23)cccc2)N3CC(O)c4ccc(F)cc4</chem>  | -6.7 | 25.3 |

|                |                                                                  |       |      |
|----------------|------------------------------------------------------------------|-------|------|
| Z91116<br>397  | c1cccc(SCC(=O)N)c1NC(=O)c2c(-c3cccs3)nn(c2)Cc4cccc4              | -3.9  | 12.5 |
| Z31380<br>858  | c1cccc1COCC(O)CNCc2ccc(cc2)CNCC(O)COCc3cccc3                     | 9.7   | 3.5  |
| Z28107<br>4182 | CCCNC(=O)C1CCN(CC1)C(=O)NCC(c2cccs2)c3c[nH]c(c34)cc<br>cc4       | 1.8   | 20   |
| Z12620<br>4560 | c1cccc1-c2c(cccc2)NC(=O)C(C)N(CC3)CCC3C(=O)Nc4c(O)cc<br>cc4      | 7.3   | 9.1  |
| Z45261<br>520  | Fc1c(F)c(F)ccc1NC(=O)C(C)Nc2c(OC)ccc(c2)NC(=O)C                  | -11.9 | 9.1  |
| Z38152<br>9764 | c1cccc(c12)cccc2NC(=O)NCC(CN(C)C)C(O)c3cccc3                     | 1.7   | 4.4  |
| Z35531<br>8320 | c1cccc1C(C(=O)N)Nc(cc2)cc(Cl)c2OCc3cc(F)ccc3                     | 8.2   | 9.5  |
| Z44580<br>929  | O1COc(c12)ccc(c2)NC(=O)NCC3CC(CCC3)CNC(=O)Nc(c4)cc<br>c(c45)OCO5 | -4.3  | 9.1  |
| Z28796<br>0806 | O1CCCC1C(=O)Nc(ccc2)cc2C(=O)Nc3ccc(cc3)Nc4cccc4                  | 9.8   | 24.1 |
| Z25457<br>9510 | O1CCOc(c12)ccc(c2)C(=O)Nc3ccc(cc3)NC(=O)Nc4cccc4                 | 22    | 15.1 |
| Z57258<br>4132 | c1cccc(c12)[nH]c(n2)C(C(C)CC)NC(=O)CSCC(=O)Nc(cc3)ccc3<br>C      | -1.4  | 7.6  |
| Z99186<br>8260 | CCn1cc(Br)cc1C(=O)Nc2ccc(cc2)NC(=O)Nc3cccc3                      | 1.1   | 10.2 |
| Z25457<br>7618 | Clc1cccc(F)c1C(=O)Nc2ccc(cc2)NC(=O)Nc3cccc3                      | -15.6 | 4.8  |
| Z27576<br>7706 | o1cccc1CNCC(O)COc2ccc(cc2)OCC(O)CNCc3ccco3                       | -8.1  | 10   |
| Z23544<br>4660 | c1cc(Cl)cc(Cl)c1C(=O)Nc2ccc(cc2)NC(=O)Nc3cccc3                   | 1.8   | 8    |
| Z23252<br>1908 | O1COc(c12)ccc(c2)NC(=O)C(C)Nc(cc3)cc(Cl)c3NC(=O)C                | 12.5  | 9    |
| Z25458<br>0030 | c1ccc(F)cc1OCC(=O)Nc2ccc(cc2)NC(=O)Nc3cccc3                      | 11.4  | 8.4  |
| Z23544<br>4696 | COc(c1)cc(OC)cc1C(=O)Nc2ccc(cc2)NC(=O)Nc3cccc3                   | -4.5  | 8.7  |

|                 |                                                                                      |       |      |
|-----------------|--------------------------------------------------------------------------------------|-------|------|
| Z10212<br>44206 | <chem>c1cc(F)c(F)cc1C(O)CNC(=O)Nc(c2)ccc(c23)n(cc3)CC(C)C</chem>                     | 13.2  | 14   |
| Z25457<br>8408  | <chem>c1cccc(OCC)c1C(=O)Nc2ccc(cc2)NC(=O)Nc3ccccc3</chem>                            | 12.3  | 8.3  |
| Z56821<br>290   | <chem>c1cc(Br)ccc1NC(=N)Nc(n2)nc(cc2C(F)(F)F)-c3cccs3</chem>                         | 9.1   | 12.4 |
| Z25458<br>5582  | <chem>C/C=C/c1cc(OC)c(cc1)OCC(=O)Nc2ccc(cc2)NC(=O)Nc3ccccc3</chem>                   | -3.8  | 18.9 |
| Z65099<br>8198  | <chem>O1CCCC1CCC(=O)NC(C)c2ccc(cc2)NC(=O)Nc3ccccc3</chem>                            | 2.3   | 4.6  |
| Z23746<br>5434  | <chem>c1cccc1SCCCC(=O)Nc2c(cccc2)NC(=O)Nc3ccccc3</chem>                              | 18.2  | 5.6  |
| Z44555<br>139   | <chem>CCNC(=O)NC(=O)C(C)NCC(c1ccccc1)c2c[nH]c(c23)cccc3</chem>                       | -0.4  | 7.3  |
| Z44462<br>183   | <chem>CC(=O)NCCNC(c1ccccc1)C(=O)Nc(c2)ccc(Cl)c2C(F)(F)F</chem>                       | 12.3  | 4.9  |
| Z40248<br>5978  | <chem>CCC(=O)Nc(cc1)ccc1C(C)NC(=O)NCc(c2)ccc(c23)OCCO3</chem>                        | 13.5  | 12.4 |
| Z31614<br>2862  | <chem>c1cccc(c12)[nH]c(n2)C(C(C)C)NC(=O)CCCNC(=O)c3ccsc3</chem>                      | 0.8   | 1.2  |
| Z44480<br>563   | <chem>CC(=O)Nc(cc1)ccc1NC(=O)C(C)NC(C)c2cccc(c23)cccc3</chem>                        | 15.8  | 5    |
| Z22347<br>3910  | <chem>FC(F)(F)c(c1)ccc(c12)SC(C(=O)N2)CC(=O)NC(Cc3ccccc3)c(n4)[nH]c(c45)cccc5</chem> | 7     | 5.3  |
| Z29394<br>570   | <chem>c1cccc(c12)[nH]c(n2)C(CCSC)NC(=O)CSCC(=O)Nc3c(F)cccc3</chem>                   | 10.3  | 4.8  |
| Z35664<br>5216  | <chem>c1cccc(F)c1C(NC(=O)N)CC(=O)NC(c2cc(C)c(C)cc2)c3ccccc3</chem>                   | 3.5   | 3.3  |
| Z22157<br>8000  | <chem>c1cccc(c12)[nH]c(n2)C(CCSC)NC(=O)CNC(=O)NCc3ccccc3</chem>                      | 12    | 5.6  |
| Z98335<br>631   | <chem>O1CCCOc(c2)c1cc(nc3N=C(N)N4)c2n3C45CCC(CC5)c6ccccc6</chem>                     | 10.5  | 6.8  |
| Z29394<br>621   | <chem>c1cccc(c12)[nH]c(n2)C(CCSC)NC(=O)CSC(C)c(n3)[nH]c(c34)c<br/>ccc4</chem>        | -10.5 | 13.4 |
| Z33985<br>0870  | <chem>c1cccc(c12)nc(n(c2=O)CC)NNC(=O)Cc3c(C)[nH]c(c34)ccc(F)c<br/>4</chem>           | -2.3  | 8.2  |

|                 |                                                                             |      |      |
|-----------------|-----------------------------------------------------------------------------|------|------|
| Z21643<br>8238  | <chem>[nH]1c(=O)[nH]c(c12)ccc(c2)NC(=O)CCc(c3C)c(C)nc4n3nc(c45)cccc5</chem> | 2.4  | 6.6  |
| Z82225<br>1060  | <chem>CC(=O)N(CC1)CCC1C(=O)Nc([nH]2)nnc2-c3cccc(c34)cccc4</chem>            | 14.1 | 10.5 |
| Z86980<br>111   | <chem>c1cc(C)c([N+](O-)=O)cc1C(=O)Nc([nH]2)nnc2-c3cccc3</chem>              | 4.1  | 19.2 |
| Z11976<br>2404  | <chem>c1cc(C(F)(F)F)ccc1C(=O)Nc([nH]2)nnc2-c(cc3)ccc3C</chem>               | 20.7 | 14.1 |
| Z65334<br>6990  | <chem>O1CCCC1C(=O)Nc(ccc2)cc2C(=O)Nc([nH]3)nnc3-c4ccccn4</chem>             | 1.9  | 3    |
| Z10773<br>3062  | <chem>c1cc(F)ccc1C(=O)Nc([nH]2)nc2-c3cc(OC)c(cc3)OC</chem>                  | 9.4  | 8.1  |
| Z99438<br>8488  | <chem>COc(cc1)ccc1N2CC(CC2=O)C(=O)Nc([nH]3)nc3-c4ccc(Cl)cc4</chem>          | 11.7 | 8.2  |
| Z99212<br>2880  | <chem>c1cccc1-c([nH]2)nc2CNC(=O)c3ccc(o3)-c(n4)sc(c45)cccc5</chem>          | 8    | 3.8  |
| Z75551<br>6366  | <chem>c1cccc(F)c1CN(C)C(=O)C(=O)Nc(c2)ccc(c23)NC(=O)CC3</chem>              | -9.5 | 5    |
| Z11939<br>8974  | <chem>c1cccc(c12)nc(cc2)C(=O)Nc([nH]3)nc3-c4cccc4</chem>                    | 17.6 | 7    |
| Z10244<br>61452 | <chem>CC(C)C(=O)N(CC1)CCC1Nc2cncc(n2)-n(n3)c(C)cc3C</chem>                  | -9.9 | 7.8  |
| Z22933<br>6870  | <chem>CCN(CC)Cc1ccc(cc1)CNC(=O)c2ccc(cc2)-c3nnc(o3)-c4cccc4</chem>          | 0.7  | 4.1  |
| Z10244<br>62168 | <chem>Cc1cc(C)n(n1)-c2cncc(n2)N(CC3)CCC3c4n(C)cnn4</chem>                   | 15.7 | 6.9  |
| Z13594<br>94878 | <chem>c1cc(O)ccc1CCNc(nc2)ccc2-c([nH]c3=O)nc(C)c3C</chem>                   | 2.9  | 6.4  |
| Z11970<br>5550  | <chem>c1ncccc1C(=O)Nc([nH]2)nnc2-c3ccc(F)cc3</chem>                         | -6   | 12.3 |
| Z10244<br>76606 | <chem>Cc1cc(C)n(n1)-c2cncc(n2)N(CC3)CCC3N(C4=O)CCN4</chem>                  | -9.7 | 7.5  |
| Z28003<br>639   | <chem>S1CCSC1c(cc2)ccc2C(=O)N(C(C)C)Cc3nnc(o3)-c4cccc4</chem>               | -0.8 | 11   |
| Z11681<br>88739 | <chem>c1cccc(F)c1CC(C)Nc(nc2)ccc2-c(n3)[nH]c(=O)cc3CC</chem>                | -0.6 | 6.7  |



|                 |                                                                         |       |      |
|-----------------|-------------------------------------------------------------------------|-------|------|
| Z10854<br>8800  | <chem>C1CCCC1C(=O)Nc([nH]n2)nc2-c3ccc(F)cc3</chem>                      | 5.9   | 9.6  |
| Z12624<br>02929 | <chem>CCOC1CC(C12CCC2)Nc(nc3)ccc3-c(n4)[nH]c(=O)cc4C</chem>             | 1.7   | 7.2  |
| Z94280<br>7650  | <chem>C1CC(=O)N(C)N=C1C(=O)Nc([nH]2)nnc2-c(s3)ccc3C</chem>              | 3.8   | 11.9 |
| Z10040<br>45752 | <chem>c1cccc1C2CCCN2C(=O)Nc(n3)nccc3-c4cccc4</chem>                     | -4.3  | 4.5  |
| Z11681<br>90911 | <chem>c1ccc(C)c(c1C)OCC(O)CNc(nc2)ccc2-c(n3)[nH]c(=O)cc3CC</chem>       | 4.2   | 10   |
| Z82694<br>6386  | <chem>Cc1cc(C)n(n1)-c(n2)cncc2NC3CCCCCCC3</chem>                        | -14.3 | 6.9  |
| Z10299<br>50632 | <chem>C1CCCCCN1C(=O)Cn(n2)cncc2NC(=O)c3ccco3</chem>                     | 5     | 16.4 |
| Z12721<br>65534 | <chem>c1n[nH]c(C)c1CCCNc(nc2)ccc2-c(n3)[nH]c(=O)cc3C</chem>             | 0.9   | 12.4 |
| Z14012<br>75534 | <chem>Cc1cc(C)n(n1)-c2cncc(n2)N(C3)CCC34CCOC4</chem>                    | 3.7   | 4.6  |
| Z21875<br>6846  | <chem>CC(C)(C)c1ccc(cc1)-c2nnc([nH]2)NC(=O)c3ccc(cc3)N(C4=O)CCN4</chem> | 14.3  | 8.4  |
| Z11976<br>4216  | <chem>Cc1ccc(cc1)-c2nnc([nH]2)NC(=O)c3ccc(cc3)OCC4CCCO4</chem>          | 6.2   | 14.5 |
| Z11963<br>2178  | <chem>O1CCOc(c12)ccc(c2)C(=O)Nc(n[nH]3)nc3-c4ccc(cc4)OC</chem>          | 14.3  | 3.5  |
| Z10854<br>8594  | <chem>c1cc(F)ccc1C(=O)Nc([nH]n2)nc2-c3ccc(F)cc3</chem>                  | 19.8  | 7.1  |
| Z64816<br>0558  | <chem>c1cccc1C(C)CC(=O)Nc([nH]2)nnc2-c3c(OC)cccc3</chem>                | 6.2   | 8.7  |
| Z65334<br>8450  | <chem>CC(C1)C1C(=O)Nc(ccc2)cc2C(=O)Nc([nH]3)nnc3-c4ccccn4</chem>        | 8.1   | 7.3  |
| Z11940<br>0894  | <chem>c1cccc1-c2nc([nH]n2)NC(=O)C(CC3=O)CN3c4cccc(C)c4C</chem>          | 5.4   | 10.5 |
| Z10244<br>61324 | <chem>CC(C)(C)C(=O)N1CCN(CC1)c(n2)cncc2-n(n3)c(C)cc3C</chem>            | 22.2  | 20.6 |
| Z82694<br>9860  | <chem>Cc1cc(C)n(n1)-c2cncc(n2)N(CC3)CCC34OCCO4</chem>                   | -8.7  | 13.3 |

|                 |                                                                      |       |      |
|-----------------|----------------------------------------------------------------------|-------|------|
| Z13107<br>60450 | <chem>C1CCC(C)C(C1C)NC(=O)Nc(n2)nnc2-c3ccccc3</chem>                 | 13.6  | 11.1 |
| Z11963<br>1624  | <chem>c1cc(C(F)(F)F)ccc1C(=O)Nc([nH]2)nnc2-c3ccc(cc3)OC</chem>       | -26.1 | 1.6  |
| Z91673<br>1876  | <chem>n1n[nH]c(c12)ccc(c2)C(=O)Nc([nH]3)nnc3-c4c(OC)cc(cc4)OC</chem> | 24.4  | 11.5 |
| Z96049<br>6910  | <chem>FC(F)(F)c1nnc([nH]1)NC(=O)c2cc(ccc2)-n3cnnc3</chem>            | 0.7   | 23.4 |
| Z11963<br>1614  | <chem>c1cc([N+](O-)=O)ccc1C(=O)Nc([nH]2)nnc2-c3ccc(cc3)OC</chem>     | 2.8   | 18.5 |
| Z11976<br>2342  | <chem>c1cccc(Br)c1C(=O)Nc(n[nH]2)nc2-c(cc3)ccc3C</chem>              | 1.6   | 5.1  |
| Z86979<br>651   | <chem>c1cc(C(F)(F)F)ccc1C(=O)Nc([nH]n2)nc2-c3ccccc3</chem>           | 19.5  | 13.9 |
| Z11963<br>1558  | <chem>c1ccc([N+](O-)=O)cc1C(=O)Nc([nH]2)nnc2-c3ccc(cc3)OC</chem>     | -14.4 | 10.9 |
| Z11976<br>2370  | <chem>c1cc(Cl)ccc1C(=O)Nc([nH]2)nnc2-c(cc3)ccc3C</chem>              | 10.2  | 2.3  |
| Z86979<br>625   | <chem>c1ccc([N+](O-)=O)cc1C(=O)Nc([nH]n2)nc2-c3ccccc3</chem>         | -4    | 6.6  |
| Z23195<br>7836  | <chem>C1CC1N(CC2)CCC2NC(=O)c3ccc(cc3)-c4nnc(o4)-c(cc5)ccc5C</chem>   | 3     | 6.4  |
| Z12764<br>55741 | <chem>CNC(=O)c1cc(ccc1)CSCc2nnc(o2)-c3ccccc3</chem>                  | -10.5 | 3.9  |
| Z11341<br>43861 | <chem>CCc1cc(=O)[nH]c(n1)-c2ccc(nc2)NCc3cc(F)cc(F)c3</chem>          | 25    | 8.1  |
| Z94280<br>9898  | <chem>O=c1[nH]c(=O)[nH]c(C)c1CCC(=O)Nc([nH]2)nnc2-c(s3)ccc3C</chem>  | 24.8  | 6.3  |
| Z11681<br>94023 | <chem>CCc1cc(=O)[nH]c(n1)-c2ccc(nc2)NCc3ccc(cc3)-n4ccnc4</chem>      | 26    | 4.7  |
| Z21246<br>1372  | <chem>Cc1n(C)nc(C)c1CCC(=O)Nc(n2)sc2-c3ccc(cc3)OC</chem>             | 2.6   | 15.1 |
| Z11341<br>34577 | <chem>CCc1cc(=O)[nH]c(n1)-c2ccc(nc2)NCc3ccc(F)cc3</chem>             | 0.6   | 16.6 |
| Z26710<br>003   | <chem>c1cccc(OC)c1CNC(=O)c2ccc(o2)-c(n3)sc(c34)cccc4</chem>          | 11.3  | 5.1  |

|                 |                                                              |      |      |
|-----------------|--------------------------------------------------------------|------|------|
| Z11722<br>37967 | <chem>CCc1cc(=O)[nH]c(n1)-c2ccc(nc2)NCc3ccco3</chem>         | 8.1  | 14.4 |
| Z11963<br>6060  | <chem>c1sccc1CCC(=O)Nc([nH]2)nnc2-c3ccc(cc3)OC</chem>        | -2.4 | 5.2  |
| Z29689<br>7106  | <chem>c1ccc(F)cc1CC(=O)Nc([nH]2)nnc2-c3ccco3</chem>          | 14.2 | 19   |
| Z13432<br>74804 | <chem>c1ccnc(c1C#N)NCCNc(nc2)ccc2-c(n3)[nH]c(=O)cc3C</chem>  | 2.7  | 5.3  |
| Z12726<br>15617 | <chem>CC(C)(C)C(=O)NCCNc(nc1)ccc1-c(n2)[nH]c(=O)cc2CC</chem> | -3.4 | 4.6  |

### Measurement of IC<sub>50</sub>

Among the seven potential hit compounds, IC<sub>50</sub> of Z820655914, Z1157725083, and Z57745307 were tried to be determined. The dose-response curves (DRC) were built using serial eight 2-fold dilution points in the range starting from 100 μM, where four wells were used. The DRCs shown in Figure S2 indicate that these compounds showed no inhibition in the range.

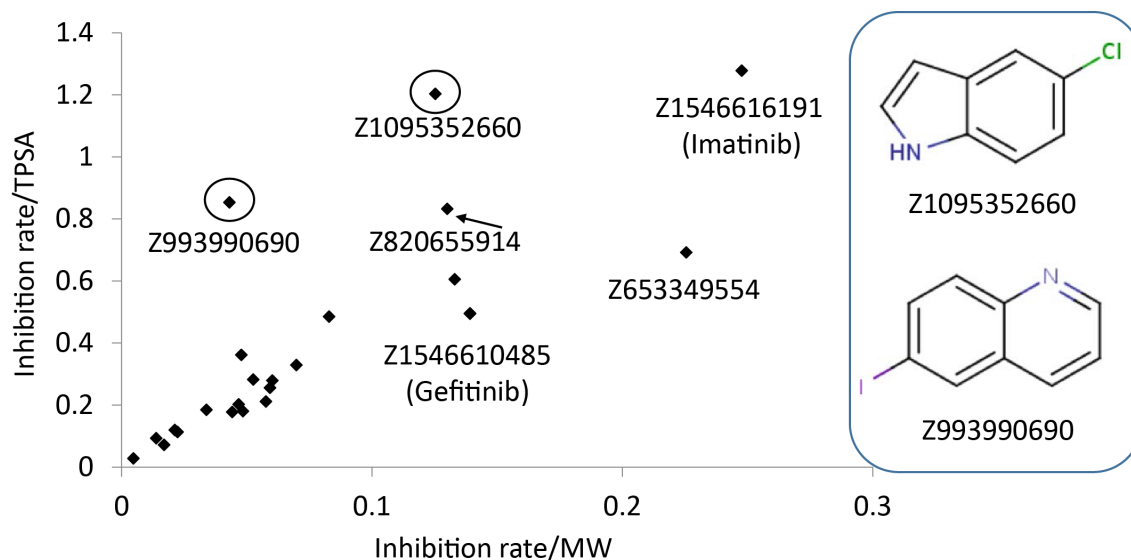

Supplementary Figure S1: Ligand efficiency indices: inhibition rate (%) divided by MW or topological polar surface area (TPSA)

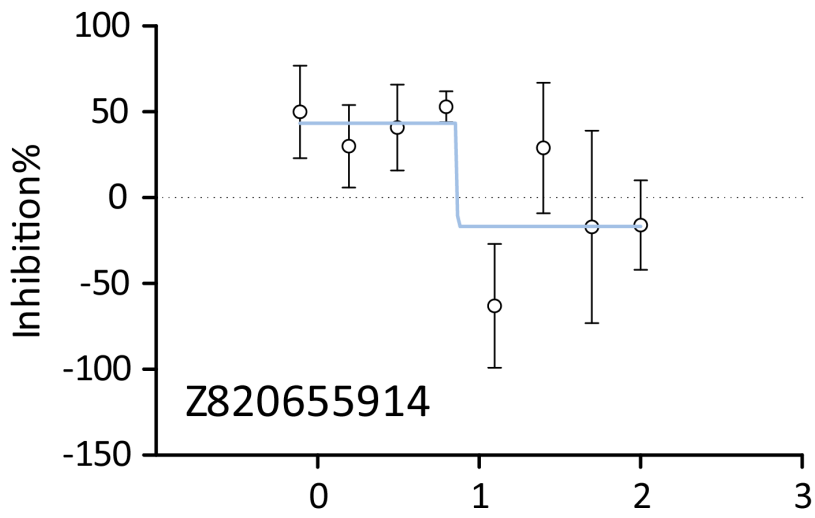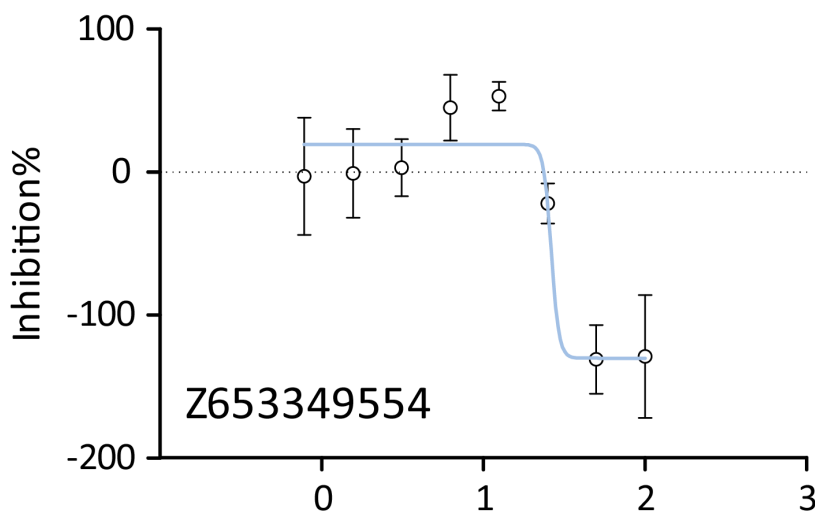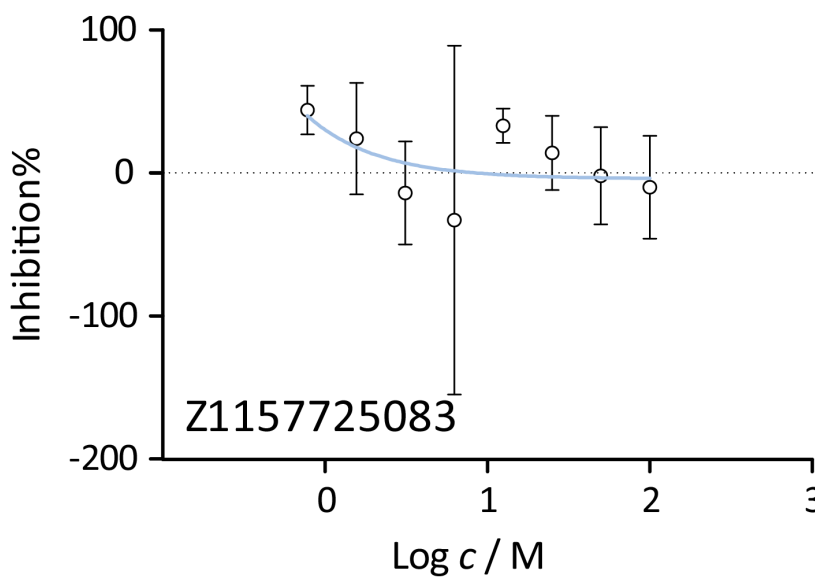

Supplementary Figure S2: Dose-response curves (DRC)
